# Supplementary material for: The CagRS Two-Component System Regulates Clavulanic Acid Metabolism via Multiple Pathways in Streptomyces clavuligerus F613-1
Source: Front Microbiol. 2019 Feb 14;10:244. doi: 10.3389/fmicb.2019.00244 (PMC6382702; doi:10.3389/fmicb.2019.00244)
Supplement: Supplementary file 2 [file Data_Sheet_2.xlsx]

## Sheet: A
Additional file 2. (A) List of enriched peaks and their location in the Streptomyces clavuligerus F613-1 genome.
chr	start	end	length	abs_summit	pileup	=-LOG10(pvalue)	fold_enrichment	=-LOG10(qvalue)	name	gene	function	Peak sequence
NZ_CP016559.1	6772468	6774444	409	109217	305.42	2.41585	1.16778	0.52199	SC1717_peak_1	BB341_RS27485	phage tail protein	ccgcggtcgttcccggcacgggcacaccaccgcgccggggccgcgttcggtaccggcggcgggtcgggctccggccgttcccggcgcggaggcaggtgtcccggctcggggcggccgttcgcggacggtcgtgggcgcggcggggcgccggtgcgggtgggggcggtcgagggggcggcgggaggagagggctcatgagctgtgttccggggccggcgacgttccggctgctcgacgcgtggaccgggtgggacccgtacaccggtccggaggagccgggggtttcggggatcgtcgggctcgacgatcccgagggcatccggctggcccgtcggggggtgccggacgggccgacccggggggagctgttgccctggttccccgatcggcggctggcgc…
NZ_CP016559.1	6711937	6712704	413	172883	326.4	3.48232	1.21299	0.87419	SC1717_peak_2	BB341_RS27240	4\'-phosphopantetheinyl transferase	agctgaccgaggtgcgctgccgccgcccgctccccccgccgccgcgaccgcccttcggcccggcggaccaccgccccgcccggtgaccccacgccccggccccggcgtgatatcccgtacggcgggcgggactccggcggcgcgccctaccgtgggcggacgaacgggcacggacgacggacgaacgggcacggatgaacggggcgccgatggacgacgggacgccgatggacgggacctggaacggcggtgaccccggtgtgctgcgactgccctcggggcggctggtcaggggccgcgggctccgcctgcccctgcccccgggccccgcccccgcactcaccctgtgtctgctgggcagacctccgcgggacgtctgccgcgccgctccccccgggg…
NZ_CP016559.1	6652192	6654408	278	229987	321.37	3.50803	1.21587	0.88511	SC1717_peak_3	BB341_RS26975	amidase	cggcggcgcgccgagtgtcagcggcggttacggcccgatgcatctgaccgatgcgcggaccgcgctccgcgaggcggcgggtccggccggcgctcctcaccgccaccccgggggcgaggaggaccggcgcggcgacgaccgccgtccgccggtggtgtccgcgaccggggccgcccttcccccggggctcgcggcgggcaccccgcccgagcggctgcgcaccctggaacgggcggcgcggctctcgggcatcgacgccggacggctgcgttccgacc
NZ_CP016559.1	6582114	6582791	281	301372	327.24	3.27319	1.20257	0.79493	SC1717_peak_4	BB341_RS26745	DNA-binding response regulator	cggctgcccgacggggacggcatcaccgtctgccgtgaactgcgctcgcggatgccggggctggcctgtctgatgctcacgtcgttcgacgacgacgacgccctgctggacgccatcatggcgggcgcctcggggtacgtcctcaagcagatcaaggggtcggacctggtggcggccgtgcggacggtggcgtccggccagtcgatgctggaccccgccacgaccgcgcggctgatgaacagtctgcgggccccgcggactccggacccggaggccgaccg
NZ_CP016559.1	6580775	6581977	466	301970	336.47	3.4802	1.20957	0.87368	SC1717_peak_5a	BB341_RS26740	hemin transporter	cggaccgcagaggtacgcggtggtgccgggctccagcgggagtccggcgaggtccgcgtgcccggtgcgcacggtgggtccggtgggccggtcggcgccgggccgctcgtaccagacatgcgcggtcgcggcgggcagcgcggcgacctgccgttcgagggcgtcccggaacgcgtggctgtccggggagcggtcggcgtggacgacggtgaccgggcgcggtgagccctcggcggccagccggccgagcatggcggccatgggtgtgcagccgatcccggccgaggccagcagcagcggaccgtcaccgtccgcgaggacgacatccccgaagggcgcgccgacgcgcagcacatcgccctcccgcacccggtcgtggagatggtgggagacctcccc…
NZ_CP016559.1	6565405	6566100	261	318368	336.47	3.78413	1.22272	0.99316	SC1717_peak_6	BB341_RS26665	IclR family transcriptional regulator	cccggagggccggatgcaggtggtcacggccgcctcgtatctgcgggccgcgtgcgcggcggtctcccgggcactgcggaacgcccatgggcccgtgccgcgcccatgaccccgcgcccatggccccgcgccggtggcccgtggtccccggtgcggtggtcctcggtgcggtgggcccgtggtccccggtgcggtggtcctcggtgcggtgggcccgtggtccccggtgcggtgggcggtggtccccggggcagtggggcg
NZ_CP016559.1	6556285	6557460	318	326411	343.18	3.83473	1.22124	1.01171	SC1717_peak_7	BB341_RS26625	acyl-CoA dehydrogenase	agggggaggcatgagcaccaccaccgaggacacacaggaatccggacaccccgcggacagcgcggccccgcgcctgcccctgctcgacagcggctggaacacgtcctggacggtgcctcccgcccgcgcgggcgccaccggacccgagcgcatccgcgacctcgccgacagcggttacgcggcgttggccgtgcccagggagctgggcggcgcgggcgagggcctggtgggtgtggccgccgcccagcgcgcgctcggccgggtcgacccctcggcggcgatcgcgctgaacatgcacgcgttcaccgtgggcctgct
NZ_CP016559.1	6240742	6241824	260	641340	330.6	2.53812	1.1676	0.5571	SC1717_peak_8	BB341_RS25520	gamma-butyrolactone biosynthesis protein	gacccgggcgggcaccgccgcgggtactccttccggccccgcgcgcccacttccgtaacggcgcggaggcgcaccgccccggttctcccaccgccccgcgagggcccgtccgagggccagtccgagggcccggccgctgacggccgccgaggtcccgggtccgcccccgcgcccccacccgaatccgaatcccgttccgccgcgcccggccctgccgccgacagggcggcggcgcacaccctccagtgaagggaacaccc
NZ_CP016559.1	6148494	6149960	451	734054	354.09	2.88089	1.1758	0.66151	SC1717_peak_9	BB341_RS25145	N-acetyltransferase	gagttcctgctgcgggcacccgcggcgctgccgccccggcagctgaccgcgaaggtcgcggcggcgggcggcagcgacacctggatcgagcgcgccgacgcccacgacctggtggacacccccacccgggtgctgggcctcgcctcccgcaccgcgctggacgcggccgaactgccgctcgccctgcgccatctcctcggccgctgcaccgtccaccaccgccccgcgcccgcccccggcggacggccccccgccgagctgccgcccccggagggcacacaggacgggaccgtgctgcggttccgcgacccgcgcggcggcgcgatcgaggtggagcgcccgcagctccccttcaccccgaccgagttcgcccgcgcccgggcgctgctggagttggac…
NZ_CP016559.1	5976223	5978397	461	906311	327.24	2.78535	1.1795	0.63354	SC1717_peak_10a	BB341_RS24435	primosome assembly protein PriA	cggacggcgagccactggcggtagcgctcctcgggcccggactcggcggtcagcagcgcgtggcggcccgcgcccagcagggcggtgagggcggcgtcgacacgggcggcccgtttgccgtcggggacgacgacgagcgcgccgcgcccggaggagagggtggcggcgacggcgcgggccagctcctcgggccagtgcggcccggggagcgcggtccacacggcccggggggtgccgccgttcgcgagggcgcgcagaaaggccggtccgctgccgtaccgggcccagcttccgggctcgggggcgggcggcggcggcagcggctcgggcgaggggcgggactcggcctttccgctgcgcggcggcacggcgagctggagtatgtcggccagcgatcct…
NZ_CP016559.1	5841496	5842395	309	1041725	314.65	3.15031	1.20295	0.75104	SC1717_peak_11	BB341_RS23815	hypothetical protein	atggctggcggtggcgtcggtgtaggtcgcccgcagcacccgggagcagcccgtcggccggagcgcggtcagcagcgcgggcgggagctgggagacgcagtccgcgtccggcgcgaccgcgacccgggtccagacgcggtcggcgcgcccggggcccgcgccgccgccgtggagggtgcgggggaagagcgtgtccaccggtgcgctgtgccacagggtgcgcgccgtcgcgtaggcggactcctcggggctgtcggcgctggagtcgccggtgagcctgggcccggtgacggcggcgccgatgaggcc
NZ_CP016559.1	5823598	5824284	431	1058757	347.38	2.43892	1.1574	0.52713	SC1717_peak_12a	BB341_RS23745	MerR family transcriptional regulator	ggctcaccgccccgggagcacgcgccccagccggacacggcacccgccgcccccggaccgccacccgcacgccaccacccggaccggcccatcccgccaggacccacgggaccgtgcacccgacccgggccgtcgcacctgacccggctggccggccgaccccgggaccacacgccccaaccggacacggcacccgccctccccggaccgccacccgcacgccaccacccggaccggcccatcccgccaggacccacgggaccgtgcacccgacccgggcccggacccttcaccacccggcgcgggcgggccgaccggcccccgcgagtcggcccgtcccgcccgccgccacggggccgtgcacccggcccggcccgtcccggtagggccgccacagga…
NZ_CP016559.1	5697521	5698996	345	1185701	338.99	2.90621	1.18463	0.66902	SC1717_peak_13	BB341_RS23220	S1 family peptidase	cacatcggcggtgtgtacggcgtcactcgcggcggcgagcgcgtacggccccgcgcgcgtgccgggggcggcggcggcgggggcggtcagcacggccacggcgaccagaccggtgagcaccgccgccgggcgcagccatcgcgccgtgatcccccagggccgaaagggccgggagcgggagggccaggacggtcggcagaggtgcgggatcgtccagatgtgcccgccggtacgggagtgcccggtggtggacgcgtatccggcggaagaggcgcggacggtggcaggtgcgtgccccgtggcaggcgcgtgtcccgtggtggacgcgtgctccgtggtggacgc
NZ_CP016559.1	5629081	5629875	292	1254376	338.15	2.61622	1.16774	0.5806	SC1717_peak_14	BB341_RS22940	hypothetical protein	gaggccccgcccgcggacgtgccctcgctcggtgaggcggagcgggagctggcggaggggctgcgggaggcgacggaggcgctgacgcggctggacgtggcggcgtcggggccggtggccgaggcggcggtggacgcgtaccgggcgcgggcggagcgggggcgccaggcgctggcgccggggtatccgccgcgggcggtacgggtgctggagctggcgcagcgggtggggctgctgatctccgtggcgcacgggagcggtcacggcggtgcggtgagcgcggcggagatgg
NZ_CP016559.1	5554832	5556283	414	1328401	325.56	3.12193	1.19742	0.74017	SC1717_peak_15	BB341_RS22595	histidine kinase	ggctcgccgccgccgaggaacgcgccgcccggctcgccgagcgcaatcgcatcgcccgtgagctgcacgactcggtggggcacgcgctcagcgcggtcaccctccaggcgggcgcggcgctgcgggtgctggagcggaaccccccgttcgtccaggaggcgctgaccgccatcgaggagaccgcccggcgcacggtgggcgagctggacgcggtcctcggactgctgcgggaggacgggatgaacggggcggacggggtggacagggcgagtgtggtggacgggacgggcggggcggggcccggactggagtcgctggcggggctggtgtcccgcagcgggctgacggtggcggtgacgggcgacgacgacttctccgccgtcccccgccgggtctccc…
NZ_CP016559.1	5537883	5539073	381	1346031	320.53	2.86574	1.18667	0.65864	SC1717_peak_16	BB341_RS22525	sensor histidine kinase	cgggcccacggccaccccgccgcccgaggggcaccaccccaccccgacccgggagcaacgggtgccacggcggccgggcacaaggcaccggcccagggcgagggcgcgcccggcgacagggcgcccggcgttctccccaagggaatccccggccgccccaggcacccgcgttctcctgcgaccccggagacctcggccgccggatcgggccccgggcagccggggatcaggcaccggcccacggcaggggcacacccggcgaccgccggacacaccggcacaggtggcggagacggcacaccaccccggcgttcccggcggaacacccgcgtcctcccgaagagccgcaggcccggccgccggaggccgccccgcgcagcc
NZ_CP016559.1	5497630	5498841	261	1385684	297.03	3.0029	1.19953	0.69951	SC1717_peak_17	BB341_RS22330	phosphoglycerate kinase	gtgcttgcggtgcacggccccgaagccgtcgccgacatagaggtcggcgagggaggcgagccggtcggcgaaggcgccgcgctcggcgtcgtccttgctggtctcgcccgggttgaagcgcaggttctccaccacggcgacctggccgtccgcgagggaggcgaccacggcgcgggccgagtcgccgacggtgtcggtggcgaaggcgacatccgtccccagcagttcgcccagccgccgcgcggcgggggcgagcgagaa
NZ_CP016559.1	5473732	5475762	381	1408903	285.29	2.47388	1.17681	0.53847	SC1717_peak_18	BB341_RS22250	export associated protein	cagccgcaccgcgagcgggcgctcccggggggcgcggtgggcatgccagaccgggttgtcccagcgggcgcaggacggcggcagcgccggttcgacgacgtcggactcggcggcgagctgggccaggtcccggtcgaggacggcgcgggcctcggcggtcagccgctcgcacttgtcccgcgcggcctcgcgggcggcgtccgccgcgccgccgacgcgggcgcgcgggtcggcgaggaggtcgtccaactcgcggtccatccgggactcggcgaagtcgacggcgccgcggtaggcggcgacgctgcgggccagatcctcgaacatgccccagacctggttgtacagccgctcctccagcgaccagccggtggcgtcccc
NZ_CP016559.1	5185162	5185425	362	1698873	357.45	9.3418	1.40568	4.12942	SC1717_peak_19	BB341_RS21065	hypothetical protein	aacgctgttccccggaccgttgcaccgaccatcgacgccggccccgacgccggccgtcgaccaccgatccggccgatccgtcggccggcttccccgagggggccaccgccatgcaggcgtcgccggtacgcccgatccgtcccgccccgttcaccccgtccgccgggtccgcccggctggtgcgcgcgcacgccctcccggccgtcacggacgcgctgcgggcgatggagtcgctgctgctcggcgtcgggcagcgcaccgcccgccgcaacgcctggaccgcggtcctggaggaccggcgccgcgccaaggaccgggtggaggcgcagcacgtactggaggccgtggcgggccggggtccg
NZ_CP016559.1	5184444	5185151	299	1699436	323.88	7.02209	1.35492	2.77585	SC1717_peak_20	BB341_RS21060	DUF4191 domain-containing protein	cgtgccgagcgggcggccttcggacagatggagggccagcccggcgccgccgcggcggtgctccagaacgtgggccggggctggaccaccaccccggcggtcgcgatgaaccgcagccaggacgtgatccaccgggccgtcggccgcgcgggcatcgtgctggtcgccgagggcaaccccaaccggctgaagccgatgctggcggccgagaagaagaagatggcgcgcgtcgtgtacgacgtaccggtgcacgacatcctggtgggcacgggcgaggaccaggtgccgctgaagaaggt
NZ_CP016559.1	5169152	5170174	463	1714760	312.14	2.80523	1.18479	0.63966	SC1717_peak_21	BB341_RS20995	glutamine synthetase	gagcaggagtacaccttcttcgagggcggccggccgctcggcttcccggtcggcggcttccccgcgccccagggcggctactactgcggtgtcggcgtggacgagatccacggccgcgacgtggtcgaggcgcacctggagaactgcctcagggcggggctgggcatctccggcatcaacgccgaggtcatgccgggccagtgggagttccaggtcggcccgctcgccccgctggaggtcgccgaccagctctggatcgcgcgctggctgctctaccgcaccgccgaggacttcggcgtctccgcgacgctggacccgaagccggtgaagggcgactggaacggcgcgggcgcgcacaccaacttctccacccgggccatgcgcgagcggtacgacgcg…
NZ_CP016559.1	5115912	5116325	329	1768080	303.75	3.50886	1.22455	0.88569	SC1717_peak_22	BB341_RS20790	hypothetical protein	ggggccggagcggacgcgcggggcagttgctgctgctcgtcgcgctgctgttcggcctcggcacgatgcacacggtgggccatccgtccccggaccgcgtccaggggcaccacggcagcgtcccggcgcccggcgcgcacgcccccggcgggatcgcggcgtccacggcggcgcggacggacggcccggaaccgggggccgggcacggcatggacccggcgctggtctgtctcgccgtgctcggcgcgtacggcgtcgcgctgctcgtcgtcggcctgcggcggcgggcacgggccctggcggcccgggtgcggcgggtccggcccacc
NZ_CP016559.1	5046880	5047674	438	1837479	338.15	3.77341	1.22036	0.98973	SC1717_peak_23	BB341_RS20505	DNA-binding response regulator	agcccccccggcccgcgcggcctgccacccgaccggcgcgacggccggacccgcgcacggagccccggccccggtcgcgtgggcagcaccgcgtgccctcgctgggcgggcccgccgcagccacaccatgccccgggagccgggacaccggggaggacccggcccgcacacggtcacctcaccgccacggcccaccgcgcacggaaccccacccccgaccgcacgcacagcaccacaccccctcgcgcggcaacccccgccaggaccacaagccaccgcatgcccgggacaccgggaagcccccggcccgcgccgcccggcacccggccccacgacagccggacccccgtacaagatcccaccccgccacggcccaccgcgcacggaaccccgcccccg…
NZ_CP016559.1	4978412	4978870	262	1905974	302.91	3.19844	1.21079	0.76729	SC1717_peak_24	BB341_RS20215	peroxiredoxin	ccatggcgtgtggttcccttccgcgcggccgcgccccatgcgccgccgcaccgccgggcccctgcggccggcggctccaccctaggccgtccgcgacctcgtgcggaacgcgcgaaggccccctcaggcggtaccggagggggcctgggcacatgggcctttcggcgcacggcccggggcatacggtccggggctggtggctcccggagcgagccaggtcttatcgcccgggtgtcacaacgacccgggtctcactctctgt
NZ_CP016559.1	4896168	4897205	289	1987301	312.98	3.29892	1.21198	0.80516	SC1717_peak_25	BB341_RS19840	ArsR family transcriptional regulator	agcacggcggcgtgctggctggcggacgcgagcgagaccccggccctgcgggccagttcgctggtggtgcagccgtagcggatcgcctggaggacggcggagcgggtgtggcccacgaggcggccgagggaggggccgagggccgtgcccgcgccctcgccgaaggccgggtcgggggtgtgggcgacggggtagaccagcacgggcggcagcgtcgcgtcccggtagacgaccggggtgccccggcagaagaacgagggctggagcagcagcccccgcccgtccagcc
NZ_CP016559.1	4896168	4897205	323	2079496	312.14	3.0154	1.19518	0.7037	SC1717_peak_26	BB341_RS19475	ArsR family transcriptional regulator	tccggctgacgcacggaggggacggggcccggcggcaccggtgggaggaaggtgctcaggggtgggtgtgcagggagacacaccgagggtcaaggttacggtgaccgctccggagggtcaaaccgggcccatgcccggcgcccggtgtccgcgtacggagagggcgtccccgggtgcggtacagggtacggcccaccgcgcggatggacccgggtgccgggatcggcgcgggcggcggcgtccgggaaccggcccggaaccgggagcagaagcggaagcggaagggcgcgaacggtccgacggcccggtccgccgccgtcccg
NZ_CP016559.1	4798811	4802929	315	2084831	317.17	2.62163	1.17407	0.58239	SC1717_peak_27	BB341_RS19465	ribonuclease E/G	cctcctcctgggcctccagcgcggcggcggcagcggcggcggcggcagccgtctcgggggtctggaacatcggctcggtgaacaccggcgcctggaagacggcgacggcgggccgcgcgccgcggcgggcgggcgcggcctcgacgggctgcccggtgaactcgggcgagacgacccggcggcgggcccggccaccgcgggtggcggtcgccgtcggctcggcggtctcggcggcgggcgcggtggccttgcgggtggcacgacggcgggtacgcggagccggggcctcgacagcctcggcggcggcttccccga
NZ_CP016559.1	4798811	4802929	445	2085640	299.55	2.31833	1.16471	0.49106	SC1717_peak_28a	BB341_RS19465	ribonuclease E/G	ggcgcgcacgcggcgccggagcctcgacagcctcggcggcgggctcggcagcggcttcctcgacgacctcggcaccctccgccacgggcgcgctcaccgcacgggtcgcgcggcggcgggcacggggcgcgggggcctcggcgggctcggccaccggctcggcgacaacctcagaggtctcgaccgactccaccacctcagcggcgggcgccgtcaccttacgcgtcgcacgacgacgcgcacgcggagccggggcctcagcggcctcggcggcgggctcggcagcgccctcctcgaccgcctccacgaccggagtactcaccgcacgcgtcgcacgacgacgcgcacgcggagccggagcctcgacggcctcggctgcggcttcctcgacgacctcgg…
NZ_CP016559.1	4479037	4479825	520	2406367	282.77	2.3059	1.17024	0.48662	SC1717_peak_29a	BB341_RS18155	RDD family protein	atcgggggtacgccgttcggaggcacggcccgggacgggccccaaacgccggacggggcccggcggaagacggcgcggcgcgggccgggcggggcgtggcctcgggcccggggcggcggtgggcggggcgtggctttcgggcgcggcaccggggccgggcgggccgcggctcggtgcaggctgcggcgtgaaacgggccacggcctcgggcgggccgcggcctcagatgcggcgcggggccgggcggggcgcggcttcagaccggcgccggggtcgggtggggcgtggccttcgggcgcggcggcgaggtcgggcgggccgcagcctcgggcgcggcaccggggacaggtgaggcgtggccttcgggcgcggcaccggggccgggtggaccactgctac…
NZ_CP016559.1	4476065	4478185	324	2408512	289.48	2.43383	1.17404	0.52622	SC1717_peak_30	BB341_RS18150	membrane protein	gggcgctgtatccgccgtgctcgccgtcggccgggcgggcgccgtgcccgccgtccacggcgctcgctccgtacccgtcgtgcacggcgttcgccccgtacccgtcgtgtgcgccgtacggcggcggaccgccggacgtcaccgacccgccctgacccgccccggcgccgtgcgggccgccggaggcttcgagggcgccgaggccactgaggccgccggggttcccgtggtccgcgtggccgccggtgcctcccgggccgtccgcgccccgggacccgcccggcccggccgtgctgcccgggccgtcgggcggcggcccgtcca
NZ_CP016559.1	4415572	4419447	310	2467415	315.49	2.46814	1.16787	0.5367	SC1717_peak_31	BB341_RS17910	hypothetical protein	cggagcaccggcacggcggcgaccggcagcgcgcacggcgcgaacagcccgcgtccccatggcaccggcgaccagggccgtaccccgtacggcggaaccggcggcccgcacacagcggccaccgccgacgcgtaccgcccggcgggccccggtggcacggaggccccggacacctacagctcggcggacgcggcggcggtgacccacggggcgggcgtgtccgggccctgggagggctccgacagcgaggacgaggacggctggggcgcccgggggcgcaaggggcggcggctcgggataggggcgtggg
NZ_CP016559.1	4377057	4377671	348	2505547	318.01	4.80634	1.27096	1.39367	SC1717_peak_32	BB341_RS17785	hypothetical protein	tgaaggcgaccagtcggacgcgggtcgccggggagccgggggtgagacggagcagtcgggccgtcgcgacgaggaaggcgggggatgtaccggtgaaggcgtgggcgggggcgttgccctcggtggcgtgtgtgcccgtggggtcggtgcggacccaggtgacgccgtcgagggcggctccccggatctgccagctcaggctctgcaaggacagccggatagggcggccgagggcgtcgagggagagatcgaccgagccggcgtgatcgccggagggggtggtgacccgggagacatagcgccagccggaggggccgggggcgcactggaagcgttcttcgccgagag
NZ_CP016559.1	4289073	4289507	500	2593848	359.13	8.75283	1.3851	3.91432	SC1717_peak_33	BB341_RS17380	hypothetical protein	ctcgttgctcctggccgtcccgctgtccgcgatcggcgtggtgaacgccggtctgctgggtctgatcaccgcgtgggcggggatcgtgggggtgaacgccgtgcacgcggcgggtccgtcgctgcaccggtggctgcgccggggcggaggggaccggtccgcgtccgagcgggaggactgaccggagcgactgaccgttccggagtgccggtaccggcccggtcaccggctccgcacaggggaggggacgggagaggtctgacgcgggggccgccgcactccccggccgccggccgggtagcgggacgacgacggcccccgcgtgagacacggtcccgggtcagggccggtctccgcgtccaggcgcaacccggggcccgggagccgctccggagccca…
NZ_CP016559.1	2980409	2980774	366	2980617	304.59	4.38693	1.26275	1.23396	SC1717_peak_34	BB341_15770	pilus assembly protein TadE	ggcggcggaccagcccgccggggcgtggtcggcggcggccagggccgcgagatcggccgccgcaccggcacggtggcggaccgccaccgcctgccccagcgccaggaccgcggcgaagacggcacagagcactcccgccgccgtcgccgtccagacgctcgcggacccccggtccccaccccgcccgaccttccgggcggctcggcccgccacgggcgcgcggacggccccggtgcccggcgtccctcggcggcggaagccgctcaccggtcccacccgccctggtggagccctgcggtgtcctcggccagagccaccgcctccgcgcggacggtcaggccccaggagcccgttccgggtgccggg
NZ_CP016559.1	3901372	3902142	391	2982008	286.96	3.27226	1.22131	0.79452	SC1717_peak_35	BB341_RS15770	type II secretion protein F	tccgccgcctcgtgcggcgccgcaccggccgagagacacgcggccagcagatcggccgccagcggcagccgggggtcgtccggcggcgactcccgcgccgccgcgcccggcgggcgggagcgcagcctgcggcgcaccccccaggcgaccgacacccccagggccaggccgggcaccccctcgacgagaaccgccagggtgatcagcgcccccgcaggggccgcccagggccgcgccagggccgccaggcgggcccggtccgggagccgccgccgcggggcggaagaagccctcagcagcacggcgccccggccgcgggtatgccgctcccggcccagggcgacagccgtgaaccccagtcggaccgccacggacagcgcgcacaccgccg
NZ_CP016559.1	3900488	3901375	327	2983135	312.98	2.92265	1.19383	0.67473	SC1717_peak_36	BB341_RS15765	hypothetical protein	cggaggccgccacggggcaggacaccgagcccgccctcccggcaccggcgaccccgcccggagcgggccgccgaggtcccggcccgccgtcagccaggccgccacgcccagggcgagggccgccgcgtacagcggctccaccggcctcacagcgcgctcccgagcagcttccgcagccgctcccagccgggctcccgggtgaactccgccgcgccccaccgcagcgcgggcacagtccgcacccaccccgcggggtcccgttccagggtgtgcacctcggcgacccgccgacggccgtcccggtcccgtacgagatggatcaccagg
NZ_CP016559.1	3605837	3607960	279	3277159	302.91	2.30431	1.1644	0.48576	SC1717_peak_37	BB341_RS14605	alpha-galactosidase	ggcggacagcaactggggccccgtggaacgcgaccgcagcaacggcgaacaggccccgggcgacggccgccccctcaccgtcggcggcaccgcctacgcccgcggtctgggggtgcacgcgccgagcaccatcggctaccacctcggcggcgcctgccgctccctcaccgtggacgtgggtgtggacgacgagatgacggcgggcggctcggtggtcttccgcgtactgcgggacggcgcggtggccgccgacagcgggctgcgcaccgcgagcgaccc
NZ_CP016559.1	3280610	3281134	525	3280763	318.01	2.61494	1.17283	0.58047	SC1717_peak_38a	BB341_RS05595	glutamate-binding protein	ccgcgcacctgccccaccccgacaccgacgcccacgccgacgcccactccctcgccgacccccacacccaccccgacaccgaccccgtcgcccactccctccccgacgcccacgccctcgcccaccccgtcgccgacgccttcgccgacccccgctccgacgccgagcacaccgccgcggcccgtcccgacgccctccgcgcagccgcccgcgcccgccgcctccgtgcggtccgcgccccccgcgcgtccggcgccgtccgccgcaccgcgccccgcggcgacccgtacggcgaagaagccggcaccgccgccgcctcccccgccgtcgccctccccccagcggttcaccgccgtgaacgagcagcggcccctggtggaaccgccctcggggggcaac…
NZ_CP016559.1	3576972	3581612	309	3305893	297.87	2.9067	1.19803	0.66902	SC1717_peak_39	BB341_RS14485	nickel transporter	aagctggccgccccgccgggcgaggagagcgattccccagccgacaccggtgcccagccgcaggtccctgccctgacgggcccccggaccccgtcggcggccaaggcgccgcagacccggcaggcaccgctcaagccgcagtcgccgcacgcgccgtcggccccgcagccgcaggcccccgggtcccggctgcccctggaccgtgcggagggccgcgcgtacgcgatcggggcacccgacgagggtgccgagggaccggagccgctggacggtccgggcggcgccgtcgaggtgacgaaccggccgcag
NZ_CP016559.1	2997845	2998429	258	3886259	298.71	2.98593	1.20102	0.69365	SC1717_peak_40	BB341_RS12020	RNA 2\',3\'-cyclic phosphodiesterase	cggctccgggggctgccggacgccggtcggctgcgctggaccgggcgggccgggtggcacttcacgctcgccttcatgggagaggtcgacggcgccgtgctgcccgagctgagcgcacggctggcgcgggccgcgcggcggacgagggccttcggggtgcggctgcacggcgcgggtcagttcggcgggcgggtgctgtggaccggggcggccggggacatcgacgggatgcggatgctcgcggagcgctcgtacgcg
NZ_CP016559.1	2915695	2916585	303	3968581	325.56	3.88337	1.23158	1.03228	SC1717_peak_41	BB341_RS11635	TetR/AcrR family transcriptional regulator	cctcgcacgagcccggactgcgggcccgcgtcgccgagctggaggagcgcctcggccgggagacccatcggatggcggtccggctgctgggcgtcgacgagtccgcgcccggcgcccgggagaccgtgcagggggtgctcgacctggcgcgggggctggggctcgcggatctgctgacggacgacggggtgcgcagggagcgggtggtggggcagtgggccgtcctggtggcccgggccctggaggacccggacccgggggcggactctccagggcccggggcaccggtggctgccggggggc
NZ_CP016559.1	2907543	2908430	311	3976296	299.55	2.31833	1.16471	0.49106	SC1717_peak_42	BB341_RS11605	alpha/beta hydrolase	catgggcgcgctcaccgcctggcggctcgccgccgcccggccggagctggtccgggcgctggtcctctgcgagatgcgggcctcggccctgggggcggcgtcccagcgggagtgggaggcgtggttcgactcctggccgctgccgttcacgaccctcgcggacgtccgccgctggttcggtggagaggacccggtcctcgaacgtcccaaccccgcccggggcgagttcttcgccgaggtgatggccgaacgggaggacggctggcggccggtcttctcccgccgccagatgctcgcggcccgctccgggt
NZ_CP016559.1	2900718	2902100	472	3983103	294.52	2.35313	1.16805	0.5013	SC1717_peak_43	BB341_RS11580	hypothetical protein	tatgtgctcgcggcgtcgatgagccatctcgcggcgcagctcggcaacccccgggagatcgcccagctcgcgcgggccgcgcaggagggggcgcgggggcatgtcaccccccgggccgaggccatgttctacgccgccgaggcccgcgggcacgccctgctcggggacgcccgcacctgccagacggtggccgggaaggcgggcgccgcgctggagcgggccgagccggacaccggcgacgacccggcgtggatcgcccacttcgaccgcgcgtacctcgcggacgaactcgcccactgctatcgcgacctgggccaggcggacgcggcggcgcagcaggccgagggcgcgctggaggggcacccggagtcccgggcccggcggcgggcgatcgggatg…
NZ_CP016559.1	3992026	3992375	350	3992276	314.65	3.69691	1.22823	0.96054	SC1717_peak_44	BB341_RS14580	DUF4239 domain-containing protein	tacggggatgcgggcggggcggcggccgaggcagttctccaggacccggaagcgcagcagcggatcgaggtcgagatcccgttcggtgtgcagcagcccgaccgcgtcccgcagccgcagcgcctcgtccgcgcagggagcgcactcgccgagatgggcctcgacggcggcgctctcctcgggcgagcaggcggacagcgcccacgcgcccaggaaggacttgagcacgctgtgggtgtcgtcgtcgccgtcgtggggaccgcgggcgctggggacggggggtactgcgggcatatcggcctcggacgggacggtcccggactcgggcccgcggtgcgcgggcgggggag
NZ_CP016559.1	2741272	2741934	361	4144120	297.87	2.33451	1.16747	0.49608	SC1717_peak_45	BB341_RS10915	dehypoxanthine futalosine cyclase	ccggggtgctcacggcggggctgtggcacacccgcgccgccgagctgctccagggcgcctaccaccccgacccccgcgaggccgacgcgctcggcaccgagccgctgaccggcgccgcgctgagcgcgctggcgccggacgggacccgctggggcggcagcgaccggcgcggggtgcagcggctcctcgcccggggcgtcaccacggtctccgggcccttcgcccggccctcggcgcacacggcggtggcccgctccgggctccgcacccggcccgcgcccccgggcgcccccgagctgaccctgagcggggcaccggccgtcggcggaccggccgatctcgccgtcttcgccctccccgg
NZ_CP016559.1	2651432	2653585	320	4232836	287.8	3.34395	1.22375	0.82313	SC1717_peak_46	BB341_RS10515	PIG-L family deacetylase	gcgaagacctggacccgcccccgcgcgtccaccaccgcgctgagcccgtcctggatctccggaccgccgaggcgccgccaggggccccagcttccgtcggccgcccgcacccgggtgctgagctgcttgtcggcgtcgcgcacgaagaggtggacccggccgtccggcgcggccaccgccaccgggaccccgatccgccggccccggtcgtcgctgtgctccgggttgccgaggcccgtccagggcaggaagtcgccgcccgcgcgccgctgctccagcagcacgatctcgcgtcggttgggcgccccccgcccgccgag
NZ_CP016559.1	2631788	2632903	253	4253654	300.39	4.2202	1.25667	1.16966	SC1717_peak_47	BB341_RS10355	hypothetical protein	gtcttttgtgccgtcgtcgccggaggtgagcaggacgcccgccgccgtggcggccacggcgacggccgcgaccgccgcgccgccgatcagcgtccgccgcttgcgccggtcccgggcggcggaggcgtcggcgagcgcggcccagtcgggggtggtggaggccgccgggggctgctgggcggcctgcggacggggctgctgctgcgggggctgcggctgtcccggcccgccctgctgcggatagcccggatac
NZ_CP016559.1	2519329	2520279	270	4366312	304.59	2.82215	1.19005	0.64472	SC1717_peak_48	BB341_RS09890	phosphatase PAP2 family protein	gagcagcggaacgggaagcgggcaggaggcggccctggcgcggagtgggcagcgggccgggccgggggccggggccggcgggacctggcctgccgcagaggtcttcggcccgtactccttccccagcgcgcacgccacctccgcgtccgccgccgccgtggccttcggcgccctgctgcccgcgcccctcggcgccgccgccctgacctcgctcgccgccgcgatgtgcctgtcccggctggtcgtcggcgtccactacccgaccgacat
NZ_CP016559.1	2474979	2476379	321	4409586	319.69	2.36374	1.16192	0.50469	SC1717_peak_49	BB341_RS09700	MFS transporter	cgaccccggtcaccgcgaggagcgcgagccccaccgtcccggcccagccgcccgcgtggaaggcgatcgcgccgagcgtgccgcccacgctgctgcccaggtagtacgaggactggtagagcgccgacgcctgcgcgcggcccgtggtcgcggtccggctcacggccgccgacgcgaccgcgtgcccggcgaagaaaccggccgtgatcagcaccaggcccagcagcacggccgtcagcgaggcggagagcgagagcagcagacccgccgccgtcgtggtcaccgccagatacagcgcgccgcgccgccccagccggtcca
NZ_CP016559.1	2474979	2476379	425	4410376	333.11	4.61117	1.25658	1.3069	SC1717_peak_50	BB341_RS09700	MFS transporter	cagcgccagcgcgccgacggccagcaggcccgcgcgccagccgccgagctgggccgcccagccggtgacgatccggccgctcatcccgccgacgctgttgcccgcgacgaagagcccgatcgcgcccaccagcgcccggggccgcacctcctccgcgagatacgccatcgcggacgcgggcagcccggccagcgcggcgccctgcacggcgcgcagcgccaccagccactccagggagggggcgaacggcaccagcagaccgaccgccaccgcgacggcgagggaggcggtcatcatcgcgcgccgcccgaaccgctcggagagcgcggacagcggaaggacgaagagggccagcgcgcccgtcgcggcggacaccgtccagctcgccgccgacgcgct…
NZ_CP016559.1	2452556	2452993	320	4432695	306.26	4.78321	1.27712	1.38219	SC1717_peak_51	BB341_RS09585	gamma-glutamylcyclotransferase	cgcctggaaacactccgcgaacgagcccgcgcggcaccccgggcgcggcggacggatttcgcaggacaacagccgggcgcggcggactttcccggggcttccggcgggcattccacggcgcgcgccggccccgcgcccgatgagttttcgccacttccgccgaagaggtggaagtggcgaggggcgcatggcagtggaaaggcgtgcgcgggggcgtgcgaaggggcgcccgggggtgtcccgggcggacccgcgcgggacgggccggtgggcgccgtgccgtcagcagggccgcttgcgcagctccatcacatagtcgt
NZ_CP016559.1	2409549	2413289	292	4474964	303.75	3.21676	1.21064	0.77249	SC1717_peak_52	BB341_RS09410	ATP-binding protein	ctgggcggcgagtccgtcggcgagctgctggggggtgcgggtgccggggcgggaggtggtgccgccggggcgggtggtgtgtgcggtgcctgcggtgctggtggcgccgggtgatccaggtgcgctgggtgttccgggggcgtgcggtgctccgggggctccggcgggggccggtgcgtctgccgtgcctgcggtaccgggcgtgctcgatgcatctgccgcacgggcagcccctgcggtacccgcggtactcgcgctgccggccgagcccagggtgccgggcgtgtcggcg
NZ_CP016559.1	2388252	2390498	300	4496561	297.87	5.10899	1.29822	1.54137	SC1717_peak_53	BB341_RS09320	membrane protein	gaccccgtgcggcggctggtctccgccaccttcccccgcttcctcgccgtgctcaccgtcgccaccggtgtgctcgtcgtcttcgcgccggagttcgtgcacgccctcgcccccggcttccgcgaccccgggctcgccgccgactgcacccggctcaccgccctcaccgtgctcacctacggagtcgccgggtacttcagcgccgccctccgcgcgcacgggcgcttcctgcaccccgccgccgtctacatcgcgtccaacgtcggcatcatcgggacgacgctgctgctgcactccgtc
NZ_CP016559.1	2385651	2387267	458	4499849	307.94	3.45422	1.22111	0.8658	SC1717_peak_54	BB341_RS31050	putative glycosyltransferase	cggctccggaggttccggcggtgccgacggctccggagggcacggtggccccgtccggacggatgaccccgccggtacggacggctccgacgggacggaccggtgcgaccggacggacggcaccggcggcaccggcggctccaccggcactggcaccggcaccgacggcggctccggcacggggagcccgccgcccgccgtacggccccccgcaccccccgaggaccgtcccccggcagcggggggcacggcggcccccggcgagaccccgcacaccgccccgccctccgtccccgcgccccctgtccccgtgccgaccgtccccgcgctgctgtccgccgtcgacgttttcgtctccgcgtcccgcgaggaggcgttcggcctcgccgtcgtcgaggc…
NZ_CP016559.1	2383775	2384974	348	4501657	289.48	2.64541	1.18564	0.5902	SC1717_peak_55	BB341_RS09300	GNAT family N-acetyltransferase	cgcccggctggcggccaagcccgcccagcggatgcgggccaagctccgccggatcgacgcgctgcggatcgagggccgcgcggtaccggaggcggaggtgccccgggccgtggcggagctgctgcggctgcacgcgctccagtggcgggggcgcggggtgacggtggagcacctgcgcccccggttcgccgagcacctggcgcgggccgcccgccggatggtgcgcgacggcgacgccgcgctgaccgagtaccggcgcgacggcgaggtggtggcggcgggcctggcgctgcactccgccgccctcaccgggggctatctctacggcgcccacccggcactgaggga
NZ_CP016559.1	2376492	2376692	399	4509495	285.29	2.5647	1.18185	0.56512	SC1717_peak_56	BB341_RS09270	hypothetical protein	aaccggtcggcggggtgcgccggggccgggcggcgcaggatctccggggggcgcagcagccggtcccactcgcggtcgggcacgccgggcagggtgcgccccgagcccgcccactcccgtgccagccgttcgtagatcgggctctcgccgcccggggccgcccctccggcggaggcggggccgaagggcatctgatgaacgcgctgccacggggcagcgggaaaagttctcgccatgcgccgccaacgcccgcggacccggtggcgtcaccgtccgggcgggggtgaccggaagcgcgtgccgcccggccgccgccccgctgcgagccggtgtgcccccgagaggcttccgctccccccgcgcgcccccgtccggcgggaccctccgggcgtccgggcg
NZ_CP016559.1	2349602	2351197	344	4536322	327.24	2.31859	1.15578	0.49111	SC1717_peak_57	BB341_RS09145	two-component sensor histidine kinase	gggctgcgggtgcgcgtccacgacgacgggcgggggctgccgcccggcaccacgctcgacgggctccgccggaaggggcgcttcggcctggtcggcatggcggagcgggccgcgtccatcggggcccggatccaggtcggcgcgggcgaggacggccggggtacggaggtacggctcgatctgccgctgcccgtgcccggcccgccggcgcggctgtccccgcaggacccgccgtcgtggcggtcgcaggacccgtcgccgcggtcgcggccgggggagtcaccggacccgccgcccggtccaccgcggccctcaccttcctcacctctctccctgtcctcacc
NZ_CP016559.1	2269986	2271086	372	4616480	302.91	4.17415	1.25582	1.14535	SC1717_peak_58	BB341_RS08815	ABC transporter ATP-binding protein	agggagccgaggggcctggggagcccggtaccgggtgagcgggacgtcgttaacgtccgggcaacgtgaccgacgcgcatccgatatacggacagggaacgctgagatccgtacggccgtgcgggtgccgtggaccggccggggacgccgcagcgctctccggccggtcggccgccccaggtcacccctcgggggcgggcgcgggcctcacccctccgggtccggcgtacgggccgccagcgtccgccgcaggaactccacctgcaacagcagtagattttcggccacctgctcctggggggtcatatgggccaccccgctcagcggcagcacctcgtgctcccgtcccgccgccagcagcgccgacgacag
NZ_CP016559.1	2262817	2264928	295	4621766	292.84	4.1868	1.26111	1.15284	SC1717_peak_59	BB341_RS08790	hypothetical protein	ccgcccccgggctgccgtacttctccgacgccccgcagaacggcttcgccgaggccccccgggaccccttcgcggacgccgccgggaacggctacgccggggccgccccgcagcctcccgtcccgggcggtccggtggcggacccggcgcggcacccggcggcgccccccgtgtacgagggcaccccgccgctcggcacgccgcttccgggtgaacccaccggcgccacctcgggaccggccaagggcagcatgccgatccgccagcggatgggcgcgggtgcctccgcggccga
NZ_CP016559.1	2199256	2203050	365	4685103	316.33	3.93479	1.23665	1.04962	SC1717_peak_60	BB341_RS08530	ATP-dependent helicase	gccgccgtcccgggcccccggcacggcaccgcccccgtcccggccccggaggatcgcaccccggtccggagcgacaccccgcccgcgcacggtgatccggcgacggccgcccccgccgccgacagcggtccgccggacgcggctgcggtcgtgcgtacggggacgggcgcttccgcggcggccggagacctgtccggcccggtcgcgggggaggcgccggacacccccgtaccggcccccggcggcggcccgccgggtgacatcgccgccgacgccgtgggcggcacctcagcggacgcggctgccgtcgtgcgtacgagtgcggagacggacgccgcagcggacggcggaccggaccggagcgg
NZ_CP016559.1	2185732	2186907	426	4700449	281.93	3.19739	1.21959	0.76729	SC1717_peak_61	BB341_RS08475	secreted protein	gaagcccgccgggcgccacgtcccagggctcggtgtgtccgccgtccagcacctccacccggcccactccggaggccgacagcagggccgccaccgaggcacccaccctgcccgcgcctctgatctgcacatgcgtcgcctgccgtgcggccagccgccgtaatccaccgccgggttccggatggaccacggagagcgcagccaggtcgggccgcagccggtcgaggaccggcgcccgatggcgcagggcctcggcctccggtccgcccgccctgacgtcgtccagcaggcccgccgccgtgagccggcccagcagggcgtccagatgtccgtccggcagccccagcgaccgggcctccgcccgcagcagtggcagcccgcgggtcccgtcgagcagat…
NZ_CP016559.1	2172495	2174843	410	4712291	295.36	3.47207	1.22461	0.86963	SC1717_peak_62	BB341_RS08420	hypothetical protein	gccgcgggctccgaggagcggtaccggcgctccgccgcctccggggacatcgccgccatgagcgcgctcggcgcgctgctgctgcgccggggcgacctggacggcgccgagcccccgctgcggggcgccaccgcgggcggggaccgcgccgccgccaacaatctgggcgtcctgctccatcagcgcggctacgccgaggaagcggccggctggtggcgcgtcgccgccgtcgccgggtcggccgccgcggcccacgccctggggcgccacttccgggagcgcggcgacgaaccgggcgccgagtactggctccgccagtccgccgagcagggccacgcgctgggcgcctacgccctcgccgatctgctggagcaccgcagcgacgtgggcgcggagcgg…
NZ_CP016559.1	2172495	2174843	551	4713502	289.48	2.5208	1.17886	0.55147	SC1717_peak_63	BB341_RS08420	hypothetical protein	caaggcggccgaggccggaagcgtggacgccgccttcaacctcggcatcctccacgtcggccgggacgacgaccgcgccgcgctgatgtggtacgagcgggcggcggccggcggccacaccgaggccgcgctccaggtgggcatcgcccggctgcgcgacggcgacgagcaggcggcggaacgccatctgcgctgcgcggcggggggcggcagcgcggaggcggccttccggctcgccaccctgctggactcccgtcagccgccgcccgggccgcaggtgctcggcgagcccatgggcgagaagaccgagtgcgaggagtggtacgagcgcgccgccgagcaggggcaccgccgcgcccaggtacgggtggggatgctcgccgccgcccgcggcgacat…
NZ_CP016559.1	2109817	2113284	259	4773723	323.88	2.34091	1.1603	0.49723	SC1717_peak_64	BB341_RS08115	metallophosphoesterase	ggaggagacccccgacccggtacgcgaccccgcccccgcagacgaccccgcgttccccgccgccctgcggcccgcccccgtgcaccgctcacccgtcgagctgtacgcgcccggccgcccgggacccggcaccggcggcgccccgcccggcgcggtcatgcggcggatcagggtccccgcccccaccgccctccccgacgcccgcgccctcgaacgctccctgcgccccctccagcgctaccggccgccgctgcgcccc
NZ_CP016559.1	2071859	2074723	395	4812236	296.19	3.59204	1.22919	0.91999	SC1717_peak_65a	BB341_RS07960	hypothetical protein	gtgaacgggagcgcctcccacgccgtcctcagcgcgggccagccgggctccgcgtccccggtcacgcgccagagcgcgagcgccgcgtccacccgcgtccccgggtccgaggagtccagtgccagccgcagctcgggcaccgcctcccgggcgaccgggcccatcgagcccagcaccccggcggcggcccgccgcgccccggtgtcggacgccagcgtcgtccgcagcagcggcagcaccgcgcccgcttcccgctccaccgcccataaggccgccgccgccttcaccgcgaacgcgccggtgtgcccgcccgtccgcgcggaacgggccagcagcccgcgcagatccggcgcggcctcccgggcggcgggcccgaacgacgtcagcgcaccgag
NZ_CP016559.1	2067773	2068855	673	4818639	310.46	6.09291	1.3275	2.17649	SC1717_peak_66	BB341_RS07940	Ku protein	gagccggaaggtggcgctggcgaagtacgcgctgcgggggcgggaacggctggggatgctccgggtcgtggacgatgtgatcgccatgcacgggctgctctggccggacgagatccgccgccccgagggggtggccccgcagaccgaggtgacggtgcgtgacgcggaactggatctcgcggacgcgctgatggacaccctcggcgaggtcgacatggactcgctgcacgacgactaccgggaggccgtcgaggccatgatcgccgcgaagtccgatggcggggccgccctgcccggggcggagggcgacgaggggcggggcggccaggtcatcgatctcatggccgcgctggagaacagcgtcaaggcggcgcgcaaggcccggtccgggggtgcgga…
NZ_CP016559.1	2043206	2044432	444	4843091	275.22	3.05595	1.2118	0.71962	SC1717_peak_67	BB341_RS07850	cytochrome P450	gnccgcaccgcggggcgcagcgcctcggcgcggcgggccaggaagtcccgggtgagcatcgagcgcagccgggagtgctgcgggtcgtccatgcggatgaacgacgccgactccgggttggcgcgcaccagttgggaggtgcgggtcagcatcgggaagccgggcgcgctcgtcaccgcggtgaagcggcggtcgcccaggacggcccgggccccggcgtgcgaggtcaccagccacacctggctgccgtcccacagcgtcacccggctcgcggccttctgggaccgcagcccggccagttgcggcggcgggtcgaccgggcagacccggtgcatcggatacgccggtgccacctggtcggactgaggcgctgcctcgttcatcatccaccgccgatcg…
NZ_CP016559.1	2040435	2041754	275	4845846	291.16	4.0205	1.25118	1.07914	SC1717_peak_68	BB341_RS07840	transcriptional regulator	gtggtacgcggagcgcaccggcgcggacgcccgccgcttcggggcgggacccgaccagggctccgtgcccggccaggccgagggccgcaaactggatgtggacgatctccatctgctccaggccgtggcccggcacggcagcatcaaccgggccgcggcggtgctgtcgatcagccagtcggcgctcacccgccggattcaccggctggagcagtccctcggcgcccggctgctgctgcgcagcccgcgggggaccagcctgaccggcccgaccc
NZ_CP016559.1	1976016	1976522	456	4910251	298.71	3.54683	1.22833	0.90171	SC1717_peak_69	BB341_RS07635	hypothetical protein	cggacggccgccgcaccctcgcctacacccaccccacccccgtgccggtgatcaccaccgccccgggggcggccggtccgggagtacggccggtaccggcatgggcccgcaccaccgccctcctcgcacccaccgtcggcggcggaatcgccgccgcaggcatcggtatctcctacgccgccccgggactgaccgccatgaccaacgccctgtgggccgctgccgccctgatcgccaccggcaccgccggagccatcgccctgcgcaccggacgcccccgggccaccggccggggcaccacccacatcacccagcagatcaccgccaccggcctcttcggccgcgccaccggcaccatcaaccaccgctgaaccgtcgggagccccatgctccaaaacc…
NZ_CP016559.1	1903499	1907590	292	4981440	311.3	3.75639	1.23075	0.98404	SC1717_peak_70	BB341_RS07305	hypothetical protein	gccgcgtccgctcgccctcggcgcgcgcgtcggtcagggtctgctcggcggcccgcagccgggcgtcggtctcgtcctggacccgggtgacctcggccgcggcctcctcctgccggacggccaccgcgcgctcggtctcctcgcgcagctcccgggcggcgcgctcggcgccctcccggaccccggcggcctgctcctcggcctcggcgtgcagccggtcggcctcctcgcggctccgctccagggtctcgtcggcctgccgccgcagcgtgcccgcgcgctcggccgcctc
NZ_CP016559.1	1890244	1890882	320	4996390	265.15	3.44403	1.23623	0.86179	SC1717_peak_71	BB341_RS07230	TetR family transcriptional regulator	gtcgctgtgcatgacggcgaccataccggcgggtagccgcggcgctgtgagccagttcacgcggtggagcttccgtgccctgggggagcggagttacgctacggggcgtagcgaaagccctgagtggccgagcgacgaccacgggcgcggggtggggaccccgcgccgaggggagcgggccgcccccggcggcggcacttttcctctgcgcgcgggaaagggggaggatgtactcatgcagcctaggaacatgtccatgagcggcgtcgtcgacctcgccgcggtgaaggcggcctcagaggccaaggccaaggccgagc
NZ_CP016559.1	1844778	1847282	257	5039927	291.16	3.08016	1.20623	0.72698	SC1717_peak_72	BB341_RS07085	hypothetical protein	rgnggcggacagggccgacgagcccaccgccgggcggctgctgctcgcgctgggcgtggaccggacggccgccggtccggtcgccgtggactgggcggacgggccgcccgcgatcggcgtggagggcgaccagcggaccgcgcgcagtgtcctccaggcgctggccgcgcagctcgaacgggttcccggcgggccggacgtggaggtgacgcgcggggtgcacgcccgctacccggggcgggacctggacgccgtcctcg
NZ_CP016559.1	1844778	1847282	298	5040450	315.49	4.9788	1.28135	1.47838	SC1717_peak_73	BB341_RS07085	hypothetical protein	ccgccaccgccgccgcggttccgtccccccggacgcccccaccccgccgggccgcccgcaaacctccctggagaagcccccgcgctccgccgcgcccgcgatcgcgccggtgaccacggccgcctccgccccgccccccgacccccgcacggcttacagcctcgcgaagcccggacccaccaccggcccgccggtacccgcaccacgcgcctccgtcgccgcctctgccgaggacctgaccgagcccggggaactgcccccggcgcggggcggcggtgcggacggcagtccgtcggcc
NZ_CP016559.1	1840156	1844781	392	5045621	284.45	2.90354	1.2011	0.66847	SC1717_peak_74	BB341_RS07080	cell division protein FtsY	gggcccgccaccgccggggccatggccaccggacgggaccaggccgaggccctgcgcgccatcggcgcccgggccgagcggcgcgaccgcgcggtgcccgccgcccgcaggcccgcgaaggtgctctcgctgccccgggagatcggcttcgccgacgcctacgcggcggtgcccgaggcgcagcgccgcccgctgtgggggctgctgggcatcggtggcgacgatctcgccccgatcggcgtcgacttcgcggccgacgccccgtccttcctggtcagcggccctcctggggccgggcgttccaccaccctcgccgcgatcgccgtctcgctgctggcgtccgggacccgggtcgtggtcctcaccccgagggagtcgccgctgcgggggct
NZ_CP016559.1	1823634	1824407	297	5062587	271.86	2.33484	1.17613	0.49608	SC1717_peak_75	BB341_RS07030	enoyl-CoA hydratase	gggcggcacccagcggctcgcccggctgatcgggccctcccgggccaaggacctgatcttcaccggccgtcaggtcacggccgacgaggcgctgacgctcggtctggtggaccgggtggtgcccgccgcggaggtgtacgaggcggcacacgcctgggccgcccggctggcgaagggcccggcgatcgccctgcgggccgccaaggagtcggtcgacgcgggtctggagaccgacatcgacaccgggctgaccatcgagcggaactggttcgcgggcctgttcgcgaccgaggaccg
NZ_CP016559.1	1735524	1736822	552	5150469	263.47	3.50049	1.24165	0.88285	SC1717_peak_76	BB341_RS06695	PucR family transcriptional regulator	ccccgcgcagtccaggaagacctcggccgtccgcgccagctccgtatgggcggggtcgagcagggtccgcacggcggggtcctgcgcccgctccgggggcagcgcggccagcatccggtacggcccgatctccgcccagcgcgccaccggctccgcgcccggccgcgcccgggccgcccgcgcggcggcggacgcctcccgccaggccgtgttcagcccggtcagcccctgccggggggcgccgacgcccaccgtgaccccggtgcccgccgcggtgcgcagccgctcggcgaccgcgagggcgggtgtctgggtgtcggccgcccgcagccgcaccaggaccgcgagggcccgcgggccgtccgcctcccggtccggcccggtccgccgctcgcgtcc…
NZ_CP016559.1	1619485	1622532	293	5265169	312.98	3.15049	1.20492	0.75105	SC1717_peak_77	BB341_RS06240	[protein-PII] uridylyltransferase [Streptomyces clavuligerus]	tcgccgaccgcatctggtaccccgtctgggacctcgggctctccctcgaccactccgtccgcacccccgccgaggcccgccgcaccgcgggcggcgatctccgcgcccacctcggactcctcgacgcccgcccggtcgccggggacctcgcccaggtggccgggttgcgcacggccgtgctcgccgactggcgcgaccaggcccagcggcgcctgcccgaactccacgacctctgccgcgagcgcgccgaacgccagggcgagctgcgcttcctgctcgaacccgacctcaag
NZ_CP016559.1	1563212	1565452	259	5323724	291.16	3.20121	1.21228	0.76729	SC1717_peak_78	BB341_RS05990	ATP-binding protein	cggggcaacagcgcgccacccctgctggtggacctcagaacctgaaccccgctcctcgcggccgccacccggcccaccggggcgcgtcctcccggctcgcggtccacggcgccgcgcccgcacgcccggccctggtgccgtgcccacgtcggtggcgggctcctccgtgcgagggacccctcatgagtgcccgtgccctggccggtccggctcctcgggtcggcgggcgccgccggcgtgtccgcgtcctcggcccgtg
NZ_CP016559.1	1547391	1548287	387	5338838	299.55	6.2662	1.34175	2.29419	SC1717_peak_79	BB341_RS05940	kinase	gccgggccgggtcgatctccaaggagtccgcgagcctgttcacccggcgacgggccgccgagggccccgacgaggcggccaccagatcctccgcgcggtcgcggaccagccgggcgaggtcgtaggcgcgctcgccgacgacgggccggggaccgaccgtgagccaggggacccggtcggcggccagcaccttgccctggcggaaggaaccgtggagcagcagagcctcgggggcgtcctcggtcagccgcgcccgggcgtcgagggctgccgtcgccagcgggtcgtccagggcgcgcagcgcgagggcctgccgggcggtccggtccgcgacggtctcgaagggatgcccggccgggggcggcacccacagccgccgtacggtcg
NZ_CP016559.1	1546631	1547140	321	5340098	264.31	3.56353	1.24358	0.90927	SC1717_peak_80	BB341_RS05935	DUF4439 domain-containing protein	gccgccaccggatcggcgcccagcccgcgcaccgtccgcgccagcgcgtcccggcgggcgcggtgggcctcgtacgcggcccgcgcgtcggcccggcgctcctgcccggcccgggcgccgacgaccccgtacccgtagaccgcggcgtgttcggccgcgagcgcggcgtggacggccgtgatcaccgcgtcgtcggcccgcgtgctccggccgctttgccccgtggccggaacccggcccgtcgttcctgtcgttcccgccgtggtcgtcgtcaccggccgccctccgtcagcagatacgcgtgggccgcgcccgccgccg
NZ_CP016559.1	1543844	1544128	401	5342613	276.9	5.83602	1.34249	2.01091	SC1717_peak_81	BB341_RS30895	DUF448 domain-containing protein	gcccggtgtgtcccgggccggggagtgaccggtgcccggaccgggaaaaccggtggaagaaaacggccgcgtgcggtgttctggcatggacgacgtgtcatcggggccgaccgagaccgatgatctccgggcgtccagggacacaccgggcgcgacggggatcaccgccggagcaggccgggcccccatcgggggccgcagccggattcggacaacgagtgttcgattcttgccccgtaggggtgaggtcggcgcggggaggtagacttaatcgtgtctggccggacgcatgcctgcgcacgccctgagcgcacctgtgtgggatgccgggagcgggcggccaaagcggatttgctgcgcatcgtggcggtcgggggtgactgtgtccccgacgatcgc…
NZ_CP016559.1	5348458	5348936	479	5348800	292.84	2.3657	1.17067	0.50582	SC1717_peak_83	BB341_RS24535	riboflavin biosynthesis protein RibD	gggagtgccgacgggctgatccgggtggtgccgcacgcgccgggagaacgggtctgccgtgccgcggccgacgccatcgtgccgctgtcccgctccggcctcgccctcgcctcgtgggcacccagggcctcgcggtaccgcccgtcccgtcagcgcccggcggcgcatcgtgcccggcacccggctgcggctgtccccgcgcggctggagcgaggcccgcgcgctcggctccgccctggccacccaccccgagcccgtacgcgtcgccctccggccccggatcgccgaggacgcgggtgccggggacgtgccgcgcgcccccgccggggtcaccgtgcccgcgcccgtctgccgggccgccgtgctcgtcgccgagtacgtgcggcggcacccggaggg…
NZ_CP016559.1	1533792	1535159	357	5351820	285.29	2.86211	1.19785	0.65753	SC1717_peak_84a	BB341_RS05880	ABC transporter ATP-binding protein	tctcgccccgcccgatctccaggtcgaccccgtcgacagcgtgcgcgggcggtccgccccgccgcccggggaacgacacccggagcccggcggccgtcagcagcggaccctcgctcatccgacccctccttcgccactgccctcgcctcggtctccgtcgcacgctccggggggcgcgacccgcacacacgccacccgatgcgccgcgcggtccgcggacacaccgtccgcggatgtgccgtccccgggaccgccgtcgtcaccgcccccggacgccgggaccgtgccaggggcgtccggtgggccgccgtcccggccgtctcccgtgcggacgcgggtgccgacaccgccggaacg
NZ_CP016559.1	1474374	1475177	423	5409588	282.77	3.19932	1.21855	0.76729	SC1717_peak_85	BB341_RS05670	Fpg/Nei family DNA glycosylase	ntgggtggcgcgggtgtcggcggcgcggtggacctcgccgccgtcggaggcgagcgtgaccccgctcggatcggtccggcgggggcggcaccgtcaccggggcggctccacagtggcgccgggcgcacggtgcggggacagcagccggtgggtcagcccgagccgggagggcacggactgccgacgacccgctgtccgagcgcgcgcccggcgccctccgccgcggcaccggggcggctccacgggcggcgcgagcggtgcgggggtggccggtggccgtggcggctgggccggatcaccggcgcgggccgggaccggaccgcgcgggggtggctccggtgcgggcgcggctccgggtgcggcgtgcggtcaggggcgtatgcgcaggcccttcggggt…
NZ_CP016559.1	1420162	1420869	302	5463099	287.8	4.2316	1.26561	1.17265	SC1717_peak_86	BB341_RS05460	ribonuclease HII	acacagtcgagcgctcgatccgggcccgcaccggcgccaggatcatcgccggggtcgacgaggtcggccgcggggcgtgggccggtcccgtcacggtgtgcgccgcgatcaccggtctgcgccgcccgcccgaaggactcaccgactccaagctcatcagccccagacgccgggacgaactcgccgccgaactggagcgctgggtcaccgcgcacgcgctgggacacgcctccccccaggagatcgacgacctgggcatgacggccgcgctgcggctcgccgcctgtcgcgcgctcgacgga
NZ_CP016559.1	1411356	1413527	344	5471906	290.32	2.54949	1.17944	0.56068	SC1717_peak_87	BB341_RS05430	ABC transporter ATP-binding protein	cctgccgctgccgcccgccgtcctcgccgccgggctgatcggagcgctctccttcggcgacgagcaccgcttccccgcgctggcgcccctgcgcggcccgctctcccggcggctcgcactcctcgccgccaagctgctcgtgaccgggggcgccgccgtcctgaccgcgctgctcgccctcgccgccgccattcccgcgctggcgctggtctacggcgtcggcacagaggtgcttccggcgccgggggaccgggccgccctcctcgtcggctggtgcgccctggccgtcggcagcgcctgggccgggctgctcggggcggggatcggccgggtcacggcggccg
NZ_CP016559.1	1291445	1294159	450	5584414	261.79	2.49014	1.18879	0.54337	SC1717_peak_88	BB341_RS05045	ABC transporter permease	ccgcgagcagcgccgcacggtcccgggccgcgtccacaccggacagcaccgagccgccgaacgcggcggtcgtcagcgccaccagcagcgccagcagcggcagcgccgtggtggcgggggagcggcccgcccgggccagcgccagaaagccgagcaggccgcgggcgcgggccaggggcagcgcgagcagccgcagcggcagcgggtacagccggacgagcagcagcgccgccgccgtgctcaccagcaccggagccgcgctgatcaactggtcgacaccgccgtccaccccggtgccgcgctgccgcagcgcgaacgcggaggccaccgccaggaccaggacggtcagttcgacgaccgtacggcgccgggtggggcgggcacggacgacatcgtccc…
NZ_CP016559.1	1224655	1226478	389	5651787	271.02	4.47777	1.28235	1.26533	SC1717_peak_89	BB341_RS04785	serine/threonine protein kinase	cgtccggccgggccgtcgtccacggcgacctctccccgggcaatgtgatggtggacgaggacggacaggccaccctggtcgacttcgggctgagcaaactgacggccgaccaccgcaccgccgagatctggttcacccccggctacgccgcgccggaggtcttcgagggcctgcgcaccccggccacggaccgctacgccttcggggcgatcgcctacttcctgctcaccggcggggcgccgccgccgtcccccggacagctcgccggagggctggccgcgctgccgcggatcgccgggctcgccccggcgcgccgggaacgcgtggtcgcgatcgcctcggccgacccggaccggcggcccgcgagcctgtcggcgtgggtggcggat
NZ_CP016559.1	1207623	1208915	323	5669469	270.18	3.57829	1.24066	0.91404	SC1717_peak_90	BB341_RS04730	ABC transporter permease	ggccgggctcgccgccgtggccttcgcggcggcctatgtcctcaaccagtacaaggggctgccgctggccctcgtcctctttctggccgccctggtgaccaccgacttcgtcctgcgccgcacggcctacgggcgcacggtcctcgccctcggcggcagcgtggaggccgcccgccgggcgggtatccccgtccatctcgtccggatctccgtcttcgccgtcgcgggcaccttcgccgcgatcggcgggctcttcatggcgtccaagatcgctgccgccaatcagagcgcgggcggcggtgagctgctgatgaacgtgatcg
NZ_CP016559.1	1170952	1172082	410	5705628	292.84	3.19165	1.21421	0.76487	SC1717_peak_91	BB341_RS04575	aminopeptidase P family protein	cccatgccgacgaccacacccccgcccttcaccgccgacgactaccgcgagcgcatggcccgcgccgtccggtccgccgccgacgccgggctcgcgggcgtcctgatcgcccccggccccgacctggtccacctcaccggctaccggctgcccgccgaaaccgaacgcctcaccctgctcgtcctcgcgcccggccgcgacccggtgctcgtcgtgcccaccctggaggcgggggacgccgcccggtccatcggcgcgcccgcgctgaccctgcgcgactggaccgacggcaaggacgacccctacgccgtggccgcgccgctgctcgccgcgggcggccggtacgcggtcagcgacaacacctgggcgctccatctgctcggcctcacccgggcgtgc…
NZ_CP016559.1	1165889	1167130	264	5711222	277.74	3.174	1.21932	0.75783	SC1717_peak_92	BB341_RS04555	MFS transporter	cggtcccggtcaccaccgtggtgatgagggcggcgccgatcaccagccccagggcctgcggtatcgcgaccgagccgctgaccgaggcccgctgccgtaccgggacccggtcggggacggcggcgacggcggcggcgagctgcgcgttcaggcccacttgggccaggcaccagccgaccgtcaccccggtgaccgtcgactgcgccgcggtgagggcgaggcccagggcgccgacggccgccccgcccgcgatccagggtctgc
NZ_CP016559.1	1131876	1132574	359	5745569	273.54	2.56493	1.1873	0.56524	SC1717_peak_93	BB341_RS04415	AraC family transcriptional regulator	acggccgaggtggtacgggccctcgcggcgggctccaccgtcgccgccgtcgccgagagcaccggactcggcgcccgacgcctgcaccgccgctcactgcacgccttcggctacgggcccaagaccctggcccgtgtcctgcgcctccaacgggccctcaccctgatccaccggggcgccccgtacgccaccgccgcggccacggcgggctgtgccgaccaggcccatctcgcccgggagatgcgggcgctcggcggcatgaccctctcggagtggtcccgccaccgcggccttgcctgacccgtgaacggggcccggccgggggcactttgcccgcgcgccccgggtgcggggcactt
NZ_CP016559.1	1109212	1109694	331	5768319	288.64	3.91484	1.24988	1.04326	SC1717_peak_94	BB341_RS04315	DUF456 domain-containing protein	ccggcacaccggggagcagcgccccgacgacgcccagcaccatcaccaggccgaccagcaggagctgccacacgcccatctgccaagggtgccggatcacgccgccccgcgcaggtccggcactccggcgctccggcacggggccgccgcgccccgccgtgcacccgatgcccccgccgaccgcccggcgctccggcggggacaggcgcgtgaccggcgctcagccgagcggttcgcgggccacccagcccttcgcgtacgcgtgccagccgagctggagccgggtcgtcacccccgccagctccatcagccccttcacccgtcgctgcac
NZ_CP016559.1	1099601	1100473	259	5777809	298.71	3.61421	1.23149	0.93021	SC1717_peak_95	BB341_RS04280	GntR family transcriptional regulator	tggtcgccgtcgccgacgacctccaccgccgcgcccaggggccccgcaccccacgcgccgccctcaccgccgacgcggcccagcacctcgccctcctcgacgcactcgcctccgaggaccacctcgcgctgcccgttctgctccaggcccatttcgccccggaggacccgcccgaggagctgtgacgcggcacggcaggcgcctgccacccggatcgcgccgtgctcgcgtgcctgtggcacgtctcccccggggggcg
NZ_CP016559.1	1085723	1087462	322	5791736	276.06	3.58504	1.23745	0.91708	SC1717_peak_96	BB341_RS04235	dehydrogenase	cgagatcgtcgccgaacggcgcggcggcagcggagccgcactcaccggcgcgcgcgtccccatccaccacgacgagcccctgaccgggcgcctcggaccggtggcctgagcccgcggtgcgatccgcccgcccgcccgtccctgttccacggtgaaacggtcctccgccgggaaacggtcctccgcccgaaaaccggttgcccccggtgcggccggggcgctgtgatggaggcggccaccggacaccttccggccggtcgtcgaccgtgcgcgtgagcagcgccgagcagcaggaagtggtgtgtgtatgccccgggccacg
NZ_CP016559.1	1077289	1078356	259	5799592	274.38	2.4006	1.17683	0.51656	SC1717_peak_97	BB341_RS04200	LacI family transcriptional regulator	ntccgacgccagcagccgacgggccgcgtccagcggcggttcgccgccgcccgcccgttccaccgtggcgggccacgcccttcccgcgcaccagcggacatacgcgtgctcgctgtcgcgcgtgtacgcgtcggacgacggtccggtcagcagcccgacccggcgtgccccgcgctcggccagatgctccatcaccagccgtacgccctgctccatgtcgctgtgcgcgtacgggacgcgggagtgctccggggccgggg
NZ_CP016559.1	1070072	1072729	311	5805124	278.57	2.82337	1.19975	0.64554	SC1717_peak_98	BB341_RS04180	ABC transporter ATP-binding protein	cgcgtcgccgtcgtccagcgggtcaccggctgcgaaccccggcacggccagagcgtcacggcgggcgacctcaccacccggctcaccgccaacgccgcggaggccgccggggtccccgtcatcaccgccaccgccgtcgcctccgtgctgatgccgctcggcggggtcgccggactcctgctcgtcgacgcgtggacggcgctcgcgctgttcgtcgcggcccccgccctcgtcgtgctgctgcggaccctcgtccgcgacacggcccaggtgtccgccgactaccagagcgaacaggcccggatcgccgg
NZ_CP016559.1	1063404	1065230	375	5812701	295.36	4.02891	1.25045	1.08187	SC1717_peak_99	BB341_RS04160	hypothetical protein	gcccccgcccccgcccccgccccgtccgcggcggcggggcgcacaccgtccgtggcgcgcccgggagatccgccgtccggcggccgtttccgcgccgcccccaccgggcccggggagcaccacgccgccgacgacaccgacaccgacaccgacatcgggtccgggtccggcccggccgtcccgccctccgtcccgccgtgcgctccggcctccgcttccgcttccgcttccgtttccccgtcgggtccggtgcccgccccgccgcccggagccctgttcgcagccgcgccgggccccctgtccggacctctgcccggcacggtggcgcgcccgctccggagcgccggcccccctgtccggcccgggaccggggcg
NZ_CP016559.1	1055209	1056255	434	5822024	324.72	2.49392	1.16747	0.54483	SC1717_peak_100	BB341_RS04130	hypothetical protein	ggcagtacgccgacccggcgggaccgcccaccctcatcgccctggacgccaacaccgtcccgccgggcgaccccgaacccgactggagccgcgtgccccgccaccgccgcgacgaccacctcgcccccggcgccgacaccgccgaccgcacccccctgcaccggctcaccggccccgtgcacgaccccctcttcaccgacgccggagcccacgccggggaccgcgcccccaccttcggcttccacccgccgggcgaggccccccgccggatcgacctcttcctcctcggccccgggctcgccgcccgcctcgcccgctaccgggccgtcgaccacccccggctcaccgcgggccccgaccgccccgccgcgtccgaccaccgccccgtcaccgtcgaac…
NZ_CP016559.1	1048982	1050043	363	5827777	305.42	2.88599	1.19231	0.66308	SC1717_peak_101	BB341_RS04100	hypothetical protein	cgccgcacggcgaaacgccgcccgcaccccacctccacgacgcgtacgacggggcagcggacccgatccccccgccgcagccccccgcgccctccgccgaccggccggacgccgtccggctcaccgaacgcgccctggacttctccctcaccgcgctccacggcctgcgcgagcgcggcacggagccacccctccccgacgacaccaccggcaccccggccgaacccctggcgcgctccaccgcgaccgccgcccttccccatgagacgccgtggaaacagggatgggcccggggcatcatggccgccgccgtcgccaccccggtggagagccgggagttggacgagcgcgccctgctgcggc
NZ_CP016559.1	1005303	1006073	324	5872209	294.52	3.1729	1.21113	0.75717	SC1717_peak_102	BB341_RS03945	hypothetical protein	cgccgagcctgcgtccgcccccggcggcgagcagcagccccgcgacgacgggagcccgcccgccgttccccgtccgctcgccgttccccgtccgctcgccgttccccgtccgctcgccgtcccccgcctgcccgccgttccccgtccgctcgccgtcccgcgtcgtccgctcgccgtcccccgcctgcccgccgttccccgtccgctcgccgtcccgcgtcgtccgcccggccatccgtcctcctgtctgtccgctgtgcttcttctcggcgtgcttcccgggccgcgggccgcaccgccccggcggcggtgcggccgtcggca
NZ_CP016559.1	975044	975811	373	5902003	263.47	2.63163	1.19474	0.58541	SC1717_peak_103	BB341_RS03800	type I methionyl aminopeptidase	ctcgttcgggacgccggggtcctcgtgcatggtgcgcccgatgccgtggccgccgaagccgtcggggatgcccgcccccgccgcgcggcagacccgtccgacggcgtgggcgatgtcgccgacacggttcccgaccacggcggcctcgatgcccgcgcgcagcgcctcctcggcgacggcgatcagccgggtgtcctcggggcgggcccggcccaccgtgaagctgacggccgagtcgcccgtccatccgtcgagggccgccccgcagtcgatgctcaccagatcgccgtcgcgcagccggtacccgtccgggatgccgtgcacgatcgcgtcgttcacggagacgcacaggacggcggggaacggcacgggc
NZ_CP016559.1	943191	944972	381	5934432	280.25	4.78544	1.29181	1.38383	SC1717_peak_104	BB341_RS03665	3-hydroxybutyryl-CoA dehydrogenase	ctgatgtcgataccgatgaccgtgcgccccgaacgggcgaggacttcggcgatcccggtacccatggtgccgaggccgacgacggcgacggtggaaagaggagtgtccatcgggggactccagggtgagtgacgactgatgagacgggaacgggccgggcccgcgccgggcacggagcggggcggcgcggtgcccgcgggccgtgtcggggcgtacgcgcgcaccgcggacccacgtgtgtgcggggcgcggacgtgctggggcgcggtgggcgcgggtgcgggcggtcggacgtacggaagggcgtgcggaggtgcggacgtacgggaggcggaccctgtcccggggtcacgccggggaccggcacacggagggcctgtg
NZ_CP016559.1	5956983	5957315	333	5957168	291.16	4.96857	1.29275	1.4736	SC1717_peak_105	BB341_RS03565	sulfite oxidase	ggtgtccggacggggtgggggtggcgcgtggtgttgccgtccggcggtgtctgcccatggaccgtccggtcgcgggcgggtgtccaaaggtgtgtccgggcgggtgggcgcggggggcgtggtgtgccgtcggcggtccgtgggaagcggccccggtccgggccgatcgccaggtgcctgggcggtgctccgccggaggggccgcccggtcggcggccgggtgccccaaggcggtgccgacgcgggtggtggtgggagcgtggtgcgccgtcggcggtgtctgtccgtcgggagcggccgggcggcgtgccggtccgtcgggtgtccggaggc
NZ_CP016559.1	907226	908560	421	5969312	285.29	4.66676	1.2838	1.33288	SC1717_peak_106	BB341_RS03510	hypothetical protein	nccctccacggcctcccgggagccgtccgccacggggaacggcgagctgagcgcccccgagagccgtaccagccgccgccgtcccgcgcccagggccgccgtcagcgcctccgcgcccgcgtgcgcgtggtcctcgtccggcgccgggggagtcccggcgcgccgcgcctccacggcggcgaccaccatcgccgccacccccgccgtccgcgcccgccactccgtcgcgccgatcccgagcgccgcctcgtacgaccgccgccgcacccggtcgtccagatggggccgaagccgcagcaactcgtcgtggatcagcgtctcgcgcacggtcagccgcagttcggccggggcccaccaggggatgcgcggcacgggcggacggtcctcgccggggtccgg…
NZ_CP016559.1	6007025	6007336	312	6007237	327.24	4.79389	1.26705	1.38802	SC1717_peak_107	BB341_RS03355	sugar phosphate isomerase/epimerase	gcccaggaacgccccgaacgccccctcccctccgggcgcgtcaccccccgcgcggccctcgccgccgccacagccctcaccgcgaccggtctcgccctcgccgcccgcgccggacgccccgccctcgccctcgccaccgccctcgccaccaccgtctgggcctacgacctccgcctcaaacacacccccgcgggccccgccgccatggccgccgcccgagcactcgacctcctcctcggggccaccgccacccaccaccgcgccccgcgccccggccccgtcaccccacccgcccccgccgccacggcccac
NZ_CP016559.1	844476	846647	344	6032465	286.13	3.24984	1.21664	0.78708	SC1717_peak_108	BB341_RS03260	chemotaxis protein CheR	cccggcggaccggcacccggatgggccccgcccgaggggctcttcgcaccgccgccgcggaagccgcccgccccgcgaccgcccggccccggagccgctcgcaccgtcccggacgccccggccgtccctgttgttccgaccgccccggccgtccccgccgccccggccgttccggggctccggccggcagccggacccgattcccccgccatcgtcttcttcaccaccggaaccaccggcaccccccgaggggtcatctccccgcaccgggccaccacccggctcgtccgggacgccaccgcctggaccggccccggacggatcatggcccagaccgcgcccgc
NZ_CP016559.1	6037524	6037910	387	6037602	263.47	3.71623	1.25257	0.96862	SC1717_peak_109a	BB341_RS22675	potassium transporter Trk	cgaggaactcccgcgtgcccggggcgaccgcgccccgcccgcagcgctgcgcgggacagcggccgaggaggggtccggccctcgtggcgcggattcacgggagcccggcgacggccgccggggccggggcggaccacggcggcaggcccggtccggcggcgggcacccgaaccgtgctcgggagcacggcactgcccacaggcaccacggatcttcctcgcgccggtcgcgcgccgtcggttcccccgcgcccggcgcccggatcaccacgaagacagcccgcggtggcaaccgctcccggcctcgtggatcacgacgaagacagcccggaacgggaatcgcccggcacccctgccccgtccgccccatggggcgcgcgtcaccccg
NZ_CP016559.1	832228	832869	362	6045407	274.38	2.9147	1.20544	0.67215	SC1717_peak_110	BB341_RS03215	ATP-binding protein	cgtagacacagccgctgcgcggcagccgcgccagcagccccaggccgtgccgggccgggaccccgaccgcgtcgcagcccagcgtgggcacgagtgccggaggcagctccagccggatcagcgaccgcccctcgccggtgcacgcggggccgccggtgccctgctgcccgctccagcggacggcggacatccggtgcctcagcacgctctctccgtcccccgcgcgggtccccggtgcagcgagcccggcctggtggcccgtaccgcgggcggcggcccctgctccccggcggcccggacgggccccgggaactccgctccgcgggaaacccgcagatgcgccacctccgcccagacggtcc
NZ_CP016559.1	818935	820404	569	6058402	271.86	4.59535	1.2917	1.30101	SC1717_peak_111	BB341_RS03170	glucose dehydrogenase	tccccgacctcaacggcacgctgtacctcgtcgaccgcgcgggcgcctcccgcccctatctggacgtgggcacggccgtcggccccgacttctggtcccatcaggggctcggcagcggtctcggctccgtcgccttccaccccggcttcgcgcacaacggcgtcttctacaccgcgcacaccgagggccgggacgcgctcaccaccagaacgcccgatctgcccgccccgcagggcgcccggctgcacagcgtcatcaccgagtggaccgccgacgaccccgcggcggcgaccttcagcggcagccgccgcgaggtgatgcgcctgggcttcgccaacacataccacaccatccaggaaatcgctttcaacccccgcaccccccgctggagccgtgcgt…
NZ_CP016559.1	814464	815465	264	6063617	270.18	5.06194	1.31006	1.51984	SC1717_peak_112	BB341_RS03155	LacI family transcriptional regulator	cgggcactctccggcgccgaggcgttcggcctggaggtgatcaccctgccctgcggctccaccaccgacgaggggtacgcgggcgcgcccgccgcgctggagagcggggcgaccgcggtgatcgcctacaacgacttcgtcgccctcggggtgctcgcccgcttctcggagctgggggtgaaggtccccgacgacatctcgctgaccggattcgacgagatcgacatggcgcgcttctccgcgccgccgctgacgacggtagcg
NZ_CP016559.1	6076893	6077198	306	6077007	252.56	3.63855	1.25526	0.93897	SC1717_peak_113	BB341_RS24785	hypothetical protein	cgtacggggggcgctggccgccgtggtggtgctgctcgccggggtgatcccgggcgcgcgggccgagagcgacggggccgccccggtgcggtacgacacgacggtggaccgggtctgcgccctccccccggagctgtccccgggaccggcgacggcgacggtgccggcgagggtgcggatcagggcgtccctgccgacgcggggccgggtcggggagccggtcctggccacgggggtgacggtcacggtcaccctcccgggcgcgtcgcggaccgcgctcgccggacggggcgccgtcacggtcgg
NZ_CP016559.1	799689	800810	266	6077735	286.96	8.16122	1.42557	3.6108	SC1717_peak_114	BB341_RS03100	hypothetical protein	ctccgcccggtccgccgctggagctgaccctcggcggccccgtgcccgccgtcaccgcctccggcgcgggagaactcaccctcaccccgggcacgctggccctggagctgaccccgttcaccgccgacggcacccccgcgaaaccggccgccctccccgtgacctgctccccgcgcgagccgcagtcgccgcagccgcccctcgccaccgtccggatcaccggcgccgacggcaccgccccgccgcccggccgcgagcaggacccc
NZ_CP016559.1	714244	714864	452	6163364	286.96	4.14704	1.263	1.1341	SC1717_peak_115	BB341_RS02760	TetR family transcriptional regulator	accagtcgccgccggtgcagtcgatcagggtggcgtcgagccccagggcccggcagcccggggtgacacggccactcccggaccggtccgacggggtgcgcgtcggcgagcggcaccggcagggcgtccacccggacgacggtgtcgcccctcgtgccgccggtcaccaggacgtcgcaggggcggggcggaccgccgggaaacgggcccggcactcccgggcgggggagcgggcgatacggcggcggggctcagcggacggcggcggtcagcgcgtcccggtcgagccccagctcacgggcgagggcctcgtcggtccacgccagcatggccgcccgcgacagcgaccccgcgtaggaggtcatctggaccgcgagcccgtccaggaaggccgtgagc…
NZ_CP016559.1	711205	712473	517	6166174	260.95	2.32403	1.17997	0.49245	SC1717_peak_116a	BB341_RS02750	MBL fold metallo-hydrolase	gcagagttcgccaagatctacttccagcgtgaggcccgggtccgcagggcgcccgcgggcccggtgcccctccaccccaccacccgcgcggatctcgccgtccccccggcgagcggactgcggctcacctggatgggccattcgagcgtgctcgcggagatcgacggggcccggctgctcttcgacccggtctggggcgagcgctgctcccccttcgccttcgccgggcccaagcggctccacccggtgcccgccccgctcgccgccctcggctccgtccacgccgtcgtgatctcgcacgaccactacgaccacctcgacctgcccaccatcagggcactggccgccaccggcaccgtcttcgcggtcccgctgggcgtcggcgcccatctcgaacgg…
NZ_CP016559.1	639885	640946	293	6237565	275.22	4.43196	1.27879	1.25185	SC1717_peak_117	BB341_RS02450	ferredoxin reductase	taccgttcgatgtcgcaggggcccgccgcggcggacacgcaggtctggatgaggacgcccggctcggcctcggtgatctcgccggtgcgcaggtcacggacggtgcccgccttgagcggcgtgacgcagccgaagcagatgcccatgcggcacccggagggcatgagcacgccggctccctcgccgacatccagcaatggcgtggtgccgtccgcgtcgacggtcctgccggtggtgctgaacgtgacctcgccaccgtcaccgtcaccgacggcggcgatggtggggcggaa
NZ_CP016559.1	589923	591044	359	6287402	269.34	3.10846	1.21777	0.73519	SC1717_peak_118	BB341_RS02270	dimethylallyltranstransferase	atgtccacggcccagcccgaccctctcttacccccggcgagcggagcggccgacgcacggcagcggacagccgccgcccaggacgcccggctcgccgatctgatcatcggtgaactcgaccgaagactggcgtccgtcgcgaaacacgccgccgtgcccaccgcccccggcaccccggccgcccggcgcgccccggcggcccccgcgccgcccctcgcccccatgggcggcctgctgcgccccctcctcctggtgcgcagcgccctcgcggtcggcggcacgctcgcgccggtgctgcccgcggccgtcggactggagtacgtccacatgggcagcctcgggcaccgcaccggcgcccc
NZ_CP016559.1	588912	589727	298	6288673	280.25	2.62312	1.18672	0.58296	SC1717_peak_119	BB341_RS02265	sulfite exporter TauE/SafE family protein	gngccgcgaacccgccgacggcgccccggggatcgctccgccgcccacactgggtgacatggacaccatcaccggtgcggagttcgcggcgctcgccgccgccgccgtgctcgtcggtttcgccaagaccgccgtcagcggcgccaacaccctcagcctcgccgtcttcgccgccgtccttccggcacgggagtcgacgggggtgctgctgccgatcctcatcgcgggggatgtgctcgccgtcctcgcctaccgccgccacgcccactggccgacgctgatacggctgttcccggccg
NZ_CP016559.1	583241	583795	392	6294923	255.08	2.30952	1.17701	0.48762	SC1717_peak_120	BB341_RS02230	hypothetical protein	atccggtggtgccggtggggggcggttccacccggcgcgtggccgctgcgcgcggacggcccgagcccttgggccagggtcagccggtaggcgtggacggtggcgcccgccagcgcgagcagcacggccagcccccacacctggacccactccggcacccgggcggggccgggcgcggtgacgagaagggtggagaccgagagcggcagggtgcacagggcttcgacggcgcagagccgggccgcgggggcgcggtccagggccaggcaggtcagatgccaccgcggccggggccccggccgggagcgggcgcccaccggtcagtccgccgcggatgtcgtgggccggtgcggcgcggggccggacgagccgcccggccgtgcggtcagcgt
NZ_CP016559.1	421052	421786	336	6319223	260.11	3.53938	1.24353	0.89769	SC1717_peak_121	BB341_RS01575	DNA-binding response regulator	agccgctgtgcgagttccacggcctgtgcgccgtcggcggcctcgccgacgacctcgacggagggttcgggaccgagcatgagcaccaggccgcggcggaccaggagctgatcgtccgcgatcagcacacggatgacggaccccgccgcacccgcacctgccgcacccgccccgcccgcaccctccgtcatcccgctcaccgcagccgcaccctctgtcattccgccggtaccgtgtgtcgtcccgttcaccgcagtgctccctcttcgtccggcagcggcaggcgggccgtgacccggtagccccgtccctcgcgccggcccgtctccagggacc
NZ_CP016559.1	369754	370260	267	6369857	281.93	2.43865	1.17888	0.52698	SC1717_peak_122	BB341_RS01355	redox-sensitive transcriptional activator SoxR	gacgccgggggccggggccgtgtcctcgtcaccctcccacgggagtaggcccgcccggccccgggggggagacagcggcgggacgggggagcgggcgtatgggtgcacggcggcgcggggcgcggggcgtacggggtacggggcgcgggcggcggcggaacggcggttaggctggccgctcatgtcgacatgacagccgggtccggcgtccggagccgggcgtcggaagccgaggggaccggtgtggagcagcggccgagcgatctg
NZ_CP016559.1	336843	337910	257	6402670	275.22	2.97961	1.20777	0.6919	SC1717_peak_123	BB341_RS01220	acyltransferase	gttcggccaccggagccagcgccgggtggtggaaggcgtacggcaccggaagccgggcacccgccacccccgcctcctcggccgcccgccggacccgggagagggcgaacagcggcccggacaccacgaaccgccgtgccgtgtcccgccccgcccgcaccacctcgggctcgccgacatcgtccagcagcgcctcgacccgttcccgcgaagcctccagcgccagcatccccccgggcagcagccgctgggaccgc
NZ_CP016559.1	290528	291793	316	6449527	276.9	4.54684	1.28656	1.2947	SC1717_peak_124	BB341_RS01050	hypothetical protein	cccttgccgtccgtcaccgccaccgaggtgagggtgccgccccgggcggtgacccgtatcggctcgcccgcccgcgccgtctgcccggcgggggtcacggtgacggcggcgggcttgccgcccgccttcgccccgcccgccttgtcgtccgatgccgcgccggagctgtccgccgtgcaggcggtgagcgcgagcggggcgagcacggcggctgccaccgcgagacgcgcggaggggtgacggacagggcgcgcggatatcggacgcaagggaacctccgtggggagccggtggtctgcggagcgcaccgggtgtg
NZ_CP016559.1	284544	284981	290	6455750	247.53	2.96994	1.22157	0.68863	SC1717_peak_125	BB341_RS01030	hypothetical protein	agtaccgcgagcggaacgggcacgggctgatcgtccgccaccgggggcggccaccgcgacccgcgcggcggtcgaccgggccgccggggccgaacggaaggggcggttcctctcccggctgaacgcccgccccccccgcgggtcgccgaagccgcctcggcctcggccgcccgcgtccggcaggccctgaccggcaccgacggcgggccggaccgcccggggcgccgtcaccggcttctgtccgcgggcggcgggtcggacgggccacggcgccgacccgacccggcgcg
NZ_CP016559.1	278757	281597	334	6458843	243.33	2.7317	1.20876	0.61727	SC1717_peak_126	BB341_RS01015	hypothetical protein	ctgctgctggatatggagctggacatggcgggggacgccctgggcgtggaagtggctgacgagcctgtcgagcacggtgtcggcccgctccaggtcccccgccctgccgtggacgagggcgagtcggcgcatggcggcgttgagggtgagatggtccagaccggcacccccggcgctgccggagtcgtcacgggagacggcgacggcatgagtgagctgggcgacggcgtccttgacgtccggcgggcggatccacagccgcccgtcggtgacggtctggaagtggcgtccggcgttggcgccccggacgagccgcgcgtagacggcgagcgga
NZ_CP016559.1	277845	278504	361	6461771	254.24	3.61239	1.25118	0.92913	SC1717_peak_127a	BB341_RS01010	hypothetical protein	naggccctccgggccgcttcctcgaacgcggaccggctcatcaccccgcgccgggtcagcacctcgccgtccgcgagccggtcgagtccggcggcgtcgaaggtgaccagcgcccggtaggcgtaggagtcgtcggggtccgcgaaacccagctcgtacgagtggtccgggagcgcggagcgcgggccgcggatctcggcccgccacggggcgggcggggtgaagagcgggaagtccgcggccggatgggtgccgcgggtctcccagccgctccactcacgtccgcccgcggcccctgtctcctgtcctgtctcctcctctgtcccctcccgcgtctcctgacgctccggcgcgtccgcttc
NZ_CP016559.1	273524	275119	443	6465365	238.3	2.33732	1.18664	0.49608	SC1717_peak_128	BB341_RS00995	RNA polymerase subunit sigma	acgcccgtgcccgccgccgccgggagatcgcgctcgcccgggtcccggagcgcggcaccgtccccgacttcgtcgacgacctcgtcgcccatctcgccgacaccgagcgactgcgggccgcgcacgcggcgctgcaccggctgcgccgccgggaccgggaggtcttcaccctggtggtgtgggccgggctcgactacgcggcggcggccgaggccctcggggtaccggtcggaaccgtccgctcccgcctctcccgcgcccgtgaccgactgcgcaccctcaccgccgccgagacccgcgcccaccgctcccgcgcgacccccacccggacctccgcaccgaggacgcccgccggagggagcgcgggtaccggggcggcggtggcggtggcgtccggca…
NZ_CP016559.1	262486	265023	487	6475495	250.88	2.39718	1.18813	0.51557	SC1717_peak_129	BB341_RS00955	sensor histidine kinase KdpD	gaggcgcccccggcgcgctgttgcgcagcgcgtccgcgatgagcgcggtgagagcgcgggcgagctgcgccgcgtccgcgatcacctcgggcagcccgtccggcacggacacctcgacggtccggcccccgggccccagctcgtccagggacgccgtcagcacctcgccgacgtccaccgggcgcaggaccgtcgcgagggcaccgccgtgcagccggttcagggtctccagatcggcgacgagccgttcggcacggcgcacggacagctgcgcggtgcccagcagccgcgcctcgtcggcccgggtcccggccccgtggcccagccgcaccagcgcctcgtccgccgtgcgcagcacggcgcgcagctcacgccccgcgcgcagcagcagcgaggccc…
NZ_CP016559.1	259496	260428	705	6480335	262.63	2.86995	1.20932	0.65891	SC1717_peak_130a	BB341_RS00940	membrane protein	agcatcccggtggacaccaccacccggccccggcgcccgccgggcagcgcgtaggcgtagggctcctcgtccgggaggaccgcgaccggcgagcgggccagccccgccagggcgtcccacgcccggcgccgcacctgacggtggtgccgcagggcacgtgagcagacgaccaccaccacgagcaggacggggatcgcgaccctgcccgcgatctcgtcgtacgggacggccgcgcgcacctccgggtccgaccagccgtccggcagcgggttgcccggcagttgggcggtgcccaccaccatcagcagggccaggcacagcgtgctgcacagcgccagcacccccgccgccgccgacagcagccaggtcgcggcccgtggatgcagatgctgctcggcc…
NZ_CP016559.1	240895	242844	514	6498096	255.92	2.90386	1.21579	0.66857	SC1717_peak_131	BB341_RS00865	hypothetical protein	acggtaccgcagcgccccgagcgcgtcgacggcggcccgcaccccggccgggtccaccccgtccaccgccgcgagcagcgccggggccgcctcggcgcaccccagccgccccagtgccacggcggcgccccggcgggcggcggccccgtccccggtgagcagagcgagcagccggtccacgggcgggtccggcagccgggcgacgatctccgccacggcctcggtgatccgttcgtcgccgagggcggccgtcagcgcgtccaccgcccgcgcaccgccgacggcggccagcgcggcggcggcgtgccggcgcacgagcggtgccggggcgtcccggagcagccgggccaggagatccgcgtccccgccgcccctgcccccgtccccgtcgcacggctc…
NZ_CP016559.1	212017	213387	322	6527195	275.22	3.54128	1.2365	0.89879	SC1717_peak_132	BB341_RS00780	NAD(P)/FAD-dependent oxidoreductase	gtcctcctcgccggtggcgaacgcctcccctacgaccggctgctcatcgccaccggcacccgcgcccgcccctggccccaccccggcgaagccgccctgcacggcgtcctggcgctgcgcaccgcggccgacgcggccctgctgagcggcctcctggacgccggaccgcgccgggtgctggtgatcggcgccggattcaccggctccgagatcgcctcggcctgccgggggcgggggctcgacgtcaccgtcgtcgaacgcgggcccgcccccctggtcggtgccctcggcggcaccctcggcgccttcgccgccgcgctcc
NZ_CP016559.1	166241	167878	285	6572584	266.83	2.45777	1.18508	0.5328	SC1717_peak_133	BB341_RS00560	prenyltransferase	gcagaacgcggacggatcgtggtcgccggaccccgacccccggatcaccgagaccgcgctcgtctgccacgccctcgcccgctcccgggggacccgcgccgatcccggcgtcgacggcgccgtcgcccgcgcccggacctggctgcgcgccgccaccccccagggccacgaccccggcgtccgcctcctggagacgctgctgcgctcccacgcgctcggcgaacccgacgcggcgcgcgccaccctgtacgagagctgccggacgaccctccccgcgcgggcccg
NZ_CP016559.1	156782	158968	270	6582504	284.45	3.76553	1.244	0.98678	SC1717_peak_134	BB341_RS00535	hypothetical protein	cgggccctcgccctctccgacgacaccctggcgagcgcgctgtccgcgttccgcacccgctcccgccggatcgccacccgggccctcgcgcactcccgtaccgccgccctgctcgacgcggacaccgcccacccggcccgcgaccgcttccaccggctgatcgaggacggactcggcgagcggctgcaccgggccgcccgcaccaccggcaccgccgccgccgcggggacaccccgccgccagagcgggggagtgccccggccgccgtcc
NZ_CP016559.1	131968	141615	347	6603836	272.7	3.58046	1.24211	0.91465	SC1717_peak_135	BB341_RS00480	hybrid non-ribosomal peptide synthetase/type I polyketide synthase	gngaggaggccgggtcgaccgcgtcccagcccgcgcgggcgggcagcggggtccggcccatcagcaccagccgccgggccccccgggcgacgagcgtgcggcacagcagccgccccagcgcgccgaaggcgcccgtgaccaggtagcagccgtccgtgcgcagccgcagcggcagcggccgggtgagcccctcggcccggcggatacggctggtgagacggcgctcgccgcgcagcgccacctcctcgtcggcggacccgtccgtcccgtccgcctcgtccgccccctccgtccccgcctccggggcggtggcggccaggatctcccccagcagcgcggcggcctcggc
NZ_CP016559.1	131968	141615	312	6605037	246.69	2.72557	1.20872	0.61536	SC1717_peak_136	BB341_RS00480	hybrid non-ribosomal peptide synthetase/type I polyketide synthase	gcgccacctcctcgatcgacagcggcagccgcaccccggtcccggcggcgctcccggcgggggccccggtgccagcggggtcctcgccggagagcagttggggggtgagcagcgactggaagcaggcgtcgagcaggacggggtgcacatggtggtccgccgtgtccccgccggccgccgccggggcgcgcagccgggccagcgcctccccgggcccgatccagacctcctcgatggcctggaaggccgggccgtagtggtagcccagggccgccagccgggcatagcactccgccccgtccatccggcgca
NZ_CP016559.1	124529	125803	331	6614760	255.08	2.30952	1.17701	0.48762	SC1717_peak_137a	BB341_RS00460	hypothetical protein	cgccgttccgtcggcgaagaacggacgctccgccgccttcgccgcccgcgcccagtcggcccgggtcgtcggggagaccagctcccgcagcagccgccaggccgcgtcgcccggcgcgaacaccgccgccagatcaccggagacctcgaaggcaccgcccccgtccgggagcccggggaccaccgtggacgtgggcgcgggcagcacgtcgtccccgtagtgcctgcggatgaacgagccctggtgctcccggtcgcagtcgccgctgttcagcagcccccgcccgtcctcgccgtcgaacggggtggacagcgccgccgggcccggcttc
NZ_CP016559.1	119473	123360	278	6620523	256.76	2.62565	1.19866	0.58385	SC1717_peak_138	BB341_RS00450	serine/threonine protein kinase	ccccggggtagccgaccagccgcaccggttcgtgcggcgcgggggactgccggtggagcaggacggggcgcgcgggcgcgggctccgtcagccgcagcaccgtgacacccccgtccacgccgtgggggtcggccagcacctcggcgggcagcagccgcccgcccggacctccggcggcggggaagtccgcgtacacccgcgacggcgcctccgccgccggacggagcgccaccacccccgcacaggtgaccaccagaccccccggcaacagcaccccg
NZ_CP016559.1	116442	119243	425	6623001	253.4	3.1694	1.22899	0.75598	SC1717_peak_139	BB341_RS00445	histidine kinase	cccgacgacatcctcggccacctcgacgaactcgtgggccgcatggaccaggagcgcaccgcgggcgacgacggccccgatgtgacgggcgcgacctgcctgtacgccatctacgacccggtcggcggggactgcgtcctcgcccgcgcgggccacccgccgcccgccgtggtccacccggacggccgggtggagatccccgacgtccccgtgtcaccgccgctcggcacgggcagcgggctgcccatcgagaccgccgccctcaagctgcccgagggctcccggctggtgctgttcacggacggcctggtcgagagcgaggaccgcgacatcgacaccggtctcgcccggctgcgcgacgccctctccgggcggcccggactgagcccggaggagacc…
NZ_CP016559.1	109355	110695	262	6630774	256.76	3.74584	1.25941	0.97951	SC1717_peak_140	BB341_RS00430	phosphoribosyltransferase	gccgacggcgcccatgcccagctcgggctggaacggcacccccagcttgcgcaccagacagatgtccagcggggcgcccagggcctcggccacccgcgccgcgacgggcacaccgccccggggcagccccaggaccaccggatcgcggtcccggagcgaggtcagccgtccggccagccgccggcccgcctcgtcccggtccaggaagtacatgcgcagcctccccacaggggcatcccccgggacaccgctcgcaccgccc
NZ_CP016559.1	48891	50465	377	6689811	245.85	2.96839	1.22409	0.68774	SC1717_peak_141	BB341_RS00200	choline oxidase	gccggaccgcacccggagccccctcccggcccgctcgccgccccgctcccggctcagcggtggtccgcccggatcagatccgcgcaccgctcaccgatcatcatcgtcgtgatgcacggattgacggtggtcagcaccggcatcaccgacgcgtccgccacccgcagccctcgtacccccttcacccgcagccgggcgtccaccggggcgtcccggtcctccgccgcgcccatccgcaccgtgcccgccggatggtagacggtgttgtgcgtctcccggacatacgcgaacagctcctcgtccgagcgggccccgggccccggcgccagctcccgccccgcccactcggccatcggcgcccgcgccacgatctcgcg
NZ_CP016559.1	41055	42485	518	6697708	269.34	2.43585	1.18054	0.52622	SC1717_peak_142a	BB341_RS00175	hypothetical protein	cccgccgacgggcgcccggccccggtccgccacggacgacgcgagcgctgaccgaatccaccccgtttcgcgcgacggacaacgggaagaagccgccgcgacccgctcggtcagccgctctcgcccagggcctccgcgagaaccgccgccggatcgtccgcccccggccccgacggcacccagcgccccgcctcccggcgatacggccaccagcggccgtcggaaccgacccgcagttgcgcgtcctgccccaccaccgtccagcgccccgcccccgcggcccgcagccggggccgctccaccccgtcccaggccgactccagggccgccgcggcccgtcccaggacatccggcccgggaacctgctccccgtcgaggacggcgagcgcgtccacgccc…
NZ_CP016559.1	34869	36158	773	6704741	263.47	2.30323	1.17543	0.48576	SC1717_peak_143a	BB341_RS00150	hypothetical protein	ctgcgggccgcggcggacgacacctgggcccgggcggcagccctcgcctccgccctcgaccccgacaccctcgccgacacggtgcccgctcccgtcgatcgcgcccggctgcgcggcctgctgcccccggtggacggcacccgctcacggtcggccgccgcccgtgagacagccgaacggctcgcccgcgcggaccacccggacgagatccggcggctccgcgcccacctggccggggaactgacccgggcacgcgccgaagaaaccgcactcccgcacactcctctaccgggaacgggaaccctcgacacgaccccctcgcccgtcccctccggaccggccccagggccgggggcggaacaagcaccgcttcggttccggcccggaccggccgggatc…
NZ_CP016559.1	21608	22798	405	6717394	291.16	5.97604	1.33407	2.09826	SC1717_peak_144	BB341_RS00090	sodium/hydrogen exchanger	ccggtccgctcggtccgccggacgaccaccgcgtcgtcctccgtccccgaggcgggaaagaccagctcatagcgttccgcgtactccatgcggcctcctgcgacggccctgccgggcggactccgcccgccctccctttccatccctccccatcgttccatcctcacccgtacgggggccacgcgcctggcggacacccaccgcgcgcgcccggcgcacgatgcgcgccggggtcaccccgctcgccccacccgtccggtcaccatgcctcggcccccgcgcccgcctcggcccgctccgcccgcagccgcagtgccgccagcgggaggacgagcacggagaccatggccgcgcccaccatcgccgacgcctcgcccgagtcgatgaccccttcgccga…
NZ_CP016559.1	5431	6924	545	6729305	260.95	3.65744	1.25357	0.94635	SC1717_peak_145	BB341_RS00030	aminotransferase class V-fold PLP-dependent enzyme	aagtcggcgggccagcggtccagccgcagggggttggacgcggtgaacgcggcggcgtcgagcaggacgtgccagccgagttcccgggcacggggaatccactccagggggtggtggacgccgctgaagttgctctgggccgggtaggcgaacaggccgcgtccgccgcgcctgccccgcagggcccggtccagggtggcgtcacagacccgcagttcgaggtcgccgggcgggacataggtggtcggcgcgcgccgggcgcgggcgaactcccgcaagccgttgaccgagttgtggttgtcgagggtgagcagcagctcggcgcgtccgcgccggaaggggtagctctcccccacgagacggcaggcggcggtggcgttggcggtgaagaccacggtg…
NZ_CP016559.1	17310	19130	286	6741525	267.67	2.72776	1.1994	0.61559	SC1717_peak_146	BB341_RS00075	siderophore biosynthesis protein	tgccgaggggtccgccccggggtacgggtgcgcggcggcgccgtggacggtgacgcggtcgcggggcagcaggagtcggcggaggcgcagccgggggtggaactcgggtgccccggagcgcagctcggcctcgccgagtccggcgcggccgcgtccggtggggtggacggggtggtcgatccgggccgcgagggtgtcgaaggcgagggcggcggcgggtccggtccagtcggcggggtgggggccgtagcgggcggtcagcgcggtggtgacggcctcctgggtg
NZ_CP016560.1	17794	18525	278	760711	245.85	2.86277	1.21801	0.65759	SC1717_peak_148	BB341_RS27820	restriction endonuclease	tccctggccgacctcgacgccctggacgacagacgcttcgagtacgccctgcgggatctgctggtccgtgacggctggcccgcccgcagggtgggcggcggcggggaccaggccgccgatgtcataggcgaccaccgccgacgcggccggatcgtcgtccaggccaagcacacccgggtcggcgggaaggtgggctcgccggtgatgtacgcggtgaagggcacggccggaccggcgcacggggcggatcacgccgtcgtcgtcaccaacggttcctt
NZ_CP016560.1	49187	50524	558	792974	276.06	4.02862	1.25879	1.08187	SC1717_peak_149	BB341_RS27965	hypothetical protein	cgtacagccggcagttgaggtcgatcagcagctcatagctcaggtcggtgtccagggccgggtggcgccgggcctgttcatggatcagcgcgagcagccgtccggggactgcggcaggggcccggccgggaggggtgtaaggggtgtggccgccgaggaggaagagcaggtcgagctggtgggcggcggggccgtgcgggtcgtctccggccccggccccggccccggactcggactcggactcggactcggcgagcagacggggggtgatctcgtcgaggagcgcggcctgttcgtcgaggaggacggtgtagggaatggtgccggagtgcagggcacggagtcggccgggcagccggtcccggacatagtcggcgagcgggtcgggggccgccgggc…
NZ_CP016560.1	70537	71997	809	814427	243.33	2.77988	1.21161	0.63165	SC1717_peak_150a	BB341_RS28050	rifampin monooxygenase	cgccggtcgcgtgtttccggccgtgcgacaggaaacgttccagcagaccgcgctggtccatcgcctccacgctgcggacatgcaggccgagtgcgcgggactgcccggtcggccgctcgttccgctccaggacgacggtgtgcacgccgtgcagccgcagctcgcacgcgagcatcagcccggtcggcccgccacccacgacgatcacgtcaatcatcacaaccccctgtcggccggggtttccggcctcggccggtgattgtgcggcacggcgggggccttgcggcaaggccccccacgcgctatacgttgagcatggcaaggagtgggtactcgccttgtccttccctttccggcagccgtggtacggcggcgataccgcgatcacggcccccatcc…
NZ_CP016560.1	72541	73728	809	814776	248.37	3.26333	1.23657	0.79045	SC1717_peak_150b	BB341_RS28055	cytochrome P450	cgccggtcgcgtgtttccggccgtgcgacaggaaacgttccagcagaccgcgctggtccatcgcctccacgctgcggacatgcaggccgagtgcgcgggactgcccggtcggccgctcgttccgctccaggacgacggtgtgcacgccgtgcagccgcagctcgcacgcgagcatcagcccggtcggcccgccacccacgacgatcacgtcaatcatcacaaccccctgtcggccggggtttccggcctcggccggtgattgtgcggcacggcgggggccttgcggcaaggccccccacgcgctatacgttgagcatggcaaggagtgggtactcgccttgtccttccctttccggcagccgtggtacggcggcgataccgcgatcacggcccccatcc…
NZ_CP016560.1	81830	83086	418	824342	262.63	2.67439	1.19833	0.59956	SC1717_peak_151	BB341_RS28095	transporter	gagaggggtcggcccttggagatgtcgaggaaggcgtcggcgcagccgcccacaccgccctgggggcgctctcccctgcggcctccgccctgaacgcacccgccgccgaactgctgtcgatcgccctgctgctggcgatgctgggctgggcggtggtccgcccccggggtctctccgaggcgttcgtcgccgtaccggccgccggggtggtcgtcctcaccggggcgctctcctgggagcacgcggccgaggaagtggcccggctgggccccgtggtgggctttctggcggctgtcctggtcctggcccggctctgcgacgacgaggggctgttccacgcctgcggggtgtggatggccgacttcgcccgggggcgcccccgccggctcctggccgcgg…
NZ_CP016560.1	83895	84362	286	826335	257.6	3.46367	1.24353	0.86833	SC1717_peak_152	BB341_RS31860	hypothetical protein	gggagtcgccacccgcggcgatgagcgaaccatctcggccggtgggtcgcttgagtcgcttgagtagctgccctgtgaaagggaactgatcaccgctcagagagccgtgcgggcgacccgctcggccccgtgcggggtggtgtgccgtgccggtgggccggacctccggggaacgggccgaagcgccggtcgggggccacgcacggctgaatccgtgggctcaggtgacagccggggggccaacgggccgaagtcgacggtgcaggtcgacaccccctgcctgtag
NZ_CP016560.1	104991	106310	484	827645	253.4	3.48909	1.2461	0.87719	SC1717_peak_153	BB341_RS28195	PLP-dependent aminotransferase family protein	gccctgcccgtgcggcgggagacatcggcggcgaaccactcccgcagcgcgggcagtccgccggtgtcggtgtactggagggccccgggccgggtcaggacccggtcgatcagcgagcggacctcgtcgaccggcagggccgttgcggcggggctgcccgcggcgagcgagatcgcgcggtcacgggccgctccgcgcagggcctcggcgatcacggagggcggcagggcggcgcagtggcgggacagccgtgcccc
NZ_CP016560.1	104991	106310	257	848522	271.02	2.60137	1.18787	0.57602	SC1717_peak_154	BB341_RS28195	PLP-dependent aminotransferase family protein	gccctgcccgtgcggcgggagacatcggcggcgaaccactcccgcagcgcgggcagtccgccggtgtcggtgtactggagggccccgggccgggtcaggacccggtcgatcagcgagcggacctcgtcgaccggcagggccgttgcggcggggctgcccgcggcgagcgagatcgcgcggtcacgggccgctccgcgcagggcctcggcgatcacggagggcggcagggcggcgcagtggcgggacagccgtgcccc
NZ_CP016560.1	115575	118766	595	859813	312.14	3.82667	1.23282	1.00741	SC1717_peak_155a	BB341_RS28250	helix-turn-helix transcriptional regulator	tgcgtgctcggctgcttcctccagggtgtggacgatccagggggcgccggtctgcggggtgtccaggaggaggggggcgatgtcggacgccggtccgccgtgccggtagagggcgtgggcgacgcggtggcgcaggaaggggagttcgtggtggtcggcggtggcgaggacggcttcgcggacggagggcagggcgagcatgggggtcagctcggcgaggtggcggcgggcggcggggagccggtccgggggcaggccggtgagggcggcggtgaagtcggtggtgagggcgggttcctggtctccggcggccggggggtcgatggtgcccgggggcaggagggccagggcgagggcgagggggcggcgctccggtgccgccgggctccgcagccagcg…
NZ_CP016560.1	143080	144111	394	886115	247.53	3.16343	1.23241	0.75354	SC1717_peak_156	BB341_RS28350	TetR/AcrR family transcriptional regulator	ccgcgcgctgtgcggtggcccactccagcagcgcctgccgccagcccgttcccggcgggggcggtgggggcggcgcgccgacggcggcctcctgcatcaggacatacagctcgtccttggcggcgacatagcggtagagggacatcgtggagacaccgagttccttggcgacccggcccatcgacaccgcgccgagcccttccgccgatgcgaccgccacggcggaggccacgatccggtcgatgctcagccccggccggggccctttggcggggcgttcgcgcaggccccatgccgcttcgacactggcgggcagccaggtgccgccgccgtcgctctcgcccaccatcacgttcgcccttcgcccggccgtgccctgtggcccgtgcctcgt
NZ_CP016560.1	159144	161714	338	903148	260.95	3.81477	1.26151	1.00413	SC1717_peak_157	BB341_RS28435	XRE family transcriptional regulator	ggtcctccaggaccaggggcagtcccagccgtgcggcggcgggggcggtgaggacgagcagcggatcggcgtccttgccgtggcggtgcagccgtgccgccccgatcccggactcggtgagcgcccacgccaccagctcgggaaccgtgccggcggggcactccaacagcacgccgcccgccgcgtaggcggtgccgtcgccgtcgagcaccgccaggggcccggaggggaaacgggggtcgcgcggcggctgcggggggtgtacggcccgggcgccgcgggctgctgcggggcggggccccggcggcacggacacgggtgcgggtgcgggtaccgct
NZ_CP016560.1	179779	180564	262	922416	276.06	4.67961	1.28864	1.33604	SC1717_peak_158	BB341_RS28520	hypothetical protein	cgtttccggcaccctggcacctgccgtccgaggtcggggcactcggtccggaggtgttggagataccggagttgccgccgcgcgctccgccggagccattgcttccgttaccgctgcacctcccggtgccaccggcgctgccgtccggcgtcgccccgcgcgccgcgcgcgcacgcacgtcgatgctgccgccgtgtccaccgcttccgccctggccgacctgagccccgccgccgcctccggctccctgggcgaccacctc
NZ_CP016560.1	186939	187223	419	929606	269.34	3.21348	1.22328	0.77115	SC1717_peak_159	BB341_RS31900	hypothetical protein	tacagccggaaggccaggccgcgttcacagccaacgggaccttcaccgtccccgccggagtcacccaggtgacattccacgcctggggccccggcggacccggcgggccgggagcgggcggcggcggaggtgccggaggaggcggaggaggaacgttcccgcctctcatctcacagccgaagggtggtggcggcggcggtgggggcgccgggggcagtggtggcggaggagggggaggcggaggtggaggttcctatgtgcagtgcaccctcgcggtggcctcgggctccgcggtacgcgtggtggtcggccagggaccgtccaccggggcacccggcggaggcggctccggcggcaacggcggtgccgccgggaccactttcgccagcggacagggcg…
NZ_CP016560.1	230260	231210	389	973755	261.79	3.58422	1.24852	0.9169	SC1717_peak_160	BB341_RS28735	glutathione S-transferase	ggccgcgggggcggcggtgcagatcctggactggaccgggcagctcccggacggggccgatgacgcgccgtcccggcgggacccggacggtttcacgaaaccgcaatacgccctccacctgaggccgcacggctccgcctagtctgcggacatacggacattcggacaggacgtgctccggtacggcctgctccggcggcgcccgctccggtatcacctgcttccctgccccccggtgcgatcacctgcttccgtacccccggcgccacgcccccgcgtccggcgccacaacgacctgcgacgagtggccggagtccgctgtcgttcctgaccgttcactgccgccggccctccgcgcgagggccggtgaccacccagggtcgaccagg
NZ_CP016560.1	232939	234351	377	976147	249.21	2.77032	1.20759	0.6307	SC1717_peak_161	BB341_RS28745	FMNH2-utilizing oxygenase	gacgtgagttcgccgcgtccagcgccgacgccatcttcagcaggcacagcaccctggaggcgggccgggagttctacgccgatgtcaagggacgcctggcccgccacggccggacccccgaccagctcctcgtcctgcccgcggcgaccttcgccctcggcgacaccgacgcggaggcgcgggaactggcccatgaggtgcggcgccaacaggtcagcggccggaccgcgatcacctacctcgaacaggtctggaaccgcgacctgtcggcgtacgacccggacggcccgctccccgccgtcgacccggaccccggtgagcacaccatcgcccagggccgcgcgagcgtccggatgttcggcgaccggctcgccgtc
NZ_CP016560.1	327225	337535	364	1072676	278.57	3.77694	1.2481	0.99067	SC1717_peak_162	BB341_RS29145	hybrid non-ribosomal peptide synthetase/type I polyketide synthase	cgagcgcggccagtcgggcgcgcagtccgggcggggtcgacgggtcggcggcgcggtcgcgccagaggtggcgcgggggcagcggggcccggtgggtgaggacgagccgcacatccccggccgtccgcgcggcgtcctcggccagcgcgaggccgatgccgccgagcccgccggtgatcagataggtgccgccgtccgtccacaggggctcggcttcccccgggacggggacggggacgggggcagcggtgggggtagcggtgggcgcgggcagcggggccggaacgggctcgtgcccgagggcgtatcgcgtgccgtcgcggtgggcgatgacgctgttggggaccaggccgtcgagttcggc
NZ_CP016560.1	349732	349914	620	1092273	250.05	3.46809	1.24489	0.86833	SC1717_peak_163a	BB341_RS31975	MULTISPECIES: hypothetical protein	gagtgagccgtgctcgcaccgccgccgggggcgtggggcgggggtcacttcccggcagcgcgcgagcccttcgccgcggcggactgcgcgcgggccgggaaaccggtctgcgcggtccggccgccggggttcttcgcgccggcggactgcacccgggaggccgcctgcggcgtcatcgacgtacgccgggcgccggtgccgctgctcctgccgctgctcttccccatgccgatcgcctcctcggccctgagctcgcagtagctacggcgaagtgacaagtagctctctgtagccgatgtgaccttctgcgacctgctgagtgcgcgggtcggccggccggtcagcaatacgggacgccgtcctcgtcctcatggacgccgtgctcatggtcgtcgtctt…

## Sheet: B
Additional file 2. (B) Transcriptome data on ChIP-seq peak-related genes. Data are shown as log2 (Fold_change) in expression in the △cagRS mutant strain relative to wild-type S. clavuligerus F613-1 at the 72 h time point. (-) indicates a decrease in expression of the gene in △cagRS; (+) indicates an increase in expression of the gene in △cagRS. Numbers highlighted in red and green indicate, respe…
ChIP-peak name	gene	function	log2(Fold_change) from transcriptome
SC1717_peak_1	BB341_RS27485	phage tail protein	5.25
SC1717_peak_2	BB341_RS27240	4\'-phosphopantetheinyl transferase	0.35
SC1717_peak_3	BB341_RS26975	amidase	-0.41
SC1717_peak_4	BB341_RS26745	DNA-binding response regulator	2.24
SC1717_peak_5a	BB341_RS26740	hemin transporter	1.38
SC1717_peak_6	BB341_RS26665	IclR family transcriptional regulator	5.44
SC1717_peak_7	BB341_RS26625	acyl-CoA dehydrogenase	5.7
SC1717_peak_8	BB341_RS25520	gamma-butyrolactone biosynthesis protein	1.38
SC1717_peak_9	BB341_RS25145	N-acetyltransferase	0.82
SC1717_peak_10a	BB341_RS24435	primosome assembly protein PriA	-1.26
SC1717_peak_11	BB341_RS23815	hypothetical protein	ND
SC1717_peak_12a	BB341_RS23745	MerR family transcriptional regulator	-0.61
SC1717_peak_13	BB341_RS23220	S1 family peptidase	ND
SC1717_peak_14	BB341_RS22940	hypothetical protein	-1.1
SC1717_peak_15	BB341_RS22595	histidine kinase	-0.43
SC1717_peak_16	BB341_RS22525	sensor histidine kinase	0.18
SC1717_peak_17	BB341_RS22330	phosphoglycerate kinase	ND
SC1717_peak_18	BB341_RS22250	export associated protein	-0.59
SC1717_peak_19	BB341_RS21065	hypothetical protein	ND
SC1717_peak_20	BB341_RS21060	DUF4191 domain-containing protein	1.52
SC1717_peak_21	BB341_RS20995	glutamine synthetase	0.84
SC1717_peak_22	BB341_RS20790	hypothetical protein	-2.2
SC1717_peak_23	BB341_RS20505	DNA-binding response regulator	-0.61
SC1717_peak_24	BB341_RS20215	peroxiredoxin	2.3
SC1717_peak_25	BB341_RS19840	ArsR family transcriptional regulator	-0.52
SC1717_peak_26	BB341_RS19475	ArsR family transcriptional regulator	-1.25
SC1717_peak_27	BB341_RS19465	ribonuclease E/G	-1.91
SC1717_peak_28a	BB341_RS19465	ribonuclease E/G	-1.91
SC1717_peak_29a	BB341_RS18155	RDD family protein	1.7
SC1717_peak_30	BB341_RS18150	membrane protein	-0.57
SC1717_peak_31	BB341_RS17910	hypothetical protein	-0.43
SC1717_peak_32	BB341_RS17785	hypothetical protein	0.31
SC1717_peak_33	BB341_RS17380	hypothetical protein	3.02
SC1717_peak_34	BB341_15770	pilus assembly protein TadE	ND
SC1717_peak_35	BB341_RS15770	type II secretion protein F	-1.81
SC1717_peak_36	BB341_RS15765	hypothetical protein	-0.07
SC1717_peak_37	BB341_RS14605	alpha-galactosidase	1.35
SC1717_peak_38a	BB341_RS05595	glutamate-binding protein	0.62
SC1717_peak_39	BB341_RS14485	nickel transporter	-0.55
SC1717_peak_40	BB341_RS12020	RNA 2\',3\'-cyclic phosphodiesterase	1.13
SC1717_peak_41	BB341_RS11635	TetR/AcrR family transcriptional regulator	-1.01
SC1717_peak_42	BB341_RS11605	alpha/beta hydrolase	-2.16
SC1717_peak_43	BB341_RS11580	hypothetical protein	-1.94
SC1717_peak_44	BB341_RS14580	DUF4239 domain-containing protein	-1.93
SC1717_peak_45	BB341_RS10915	dehypoxanthine futalosine cyclase	-1.11
SC1717_peak_46	BB341_RS10515	PIG-L family deacetylase	0.310288
SC1717_peak_47	BB341_RS10355	hypothetical protein	ND
SC1717_peak_48	BB341_RS09890	phosphatase PAP2 family protein	0.107854
SC1717_peak_49	BB341_RS09700	MFS transporter	2.59
SC1717_peak_50	BB341_RS09700	MFS transporter	2.59
SC1717_peak_51	BB341_RS09585	gamma-glutamylcyclotransferase	0.258817
SC1717_peak_52	BB341_RS09410	ATP-binding protein	-0.56
SC1717_peak_53	BB341_RS09320	membrane protein	0.0936599
SC1717_peak_54	BB341_RS31050	putative glycosyltransferase	ND
SC1717_peak_55	BB341_RS09300	GNAT family N-acetyltransferase	0.196217
SC1717_peak_56	BB341_RS09270	hypothetical protein	ND
SC1717_peak_57	BB341_RS09145	two-component sensor histidine kinase	ND
SC1717_peak_58	BB341_RS08815	ABC transporter ATP-binding protein	1.48
SC1717_peak_59	BB341_RS08790	hypothetical protein	ND
SC1717_peak_60	BB341_RS08530	ATP-dependent helicase	0.160595
SC1717_peak_61	BB341_RS08475	secreted protein	-0.66
SC1717_peak_62	BB341_RS08420	hypothetical protein	0.297584
SC1717_peak_63	BB341_RS08420	hypothetical protein	0.297584
SC1717_peak_64	BB341_RS08115	metallophosphoesterase	2.13
SC1717_peak_65a	BB341_RS07960	hypothetical protein	0.131366
SC1717_peak_66	BB341_RS07940	Ku protein	0.321266
SC1717_peak_67	BB341_RS07850	cytochrome P450	0.183557
SC1717_peak_68	BB341_RS07840	transcriptional regulator	-0.41
SC1717_peak_69	BB341_RS07635	hypothetical protein	0.466699
SC1717_peak_70	BB341_RS07305	hypothetical protein	-0.74
SC1717_peak_71	BB341_RS07230	TetR family transcriptional regulator	1.73
SC1717_peak_72	BB341_RS07085	hypothetical protein	ND
SC1717_peak_73	BB341_RS07085	hypothetical protein	ND
SC1717_peak_74	BB341_RS07080	cell division protein FtsY	-0.09
SC1717_peak_75	BB341_RS07030	enoyl-CoA hydratase	0.877696
SC1717_peak_76	BB341_RS06695	PucR family transcriptional regulator	0.0762785
SC1717_peak_77	BB341_RS06240	[protein-PII] uridylyltransferase [Streptomyces clavuligerus]	0.353252
SC1717_peak_78	BB341_RS05990	ATP-binding protein	-0.32
SC1717_peak_79	BB341_RS05940	kinase	-1.84
SC1717_peak_80	BB341_RS05935	DUF4439 domain-containing protein	-1.58
SC1717_peak_81	BB341_RS30895	DUF448 domain-containing protein	ND
SC1717_peak_83	BB341_RS24535	riboflavin biosynthesis protein RibD	ND
SC1717_peak_84a	BB341_RS05880	ABC transporter ATP-binding protein	0.110841
SC1717_peak_85	BB341_RS05670	Fpg/Nei family DNA glycosylase	1.31073
SC1717_peak_86	BB341_RS05460	ribonuclease HII	1.19
SC1717_peak_87	BB341_RS05430	ABC transporter ATP-binding protein	1.02575
SC1717_peak_88	BB341_RS05045	ABC transporter permease	-1.15
SC1717_peak_89	BB341_RS04785	serine/threonine protein kinase	0.851461
SC1717_peak_90	BB341_RS04730	ABC transporter permease	-0.7
SC1717_peak_91	BB341_RS04575	aminopeptidase P family protein	-0.04
SC1717_peak_92	BB341_RS04555	MFS transporter	0.322954
SC1717_peak_93	BB341_RS04415	AraC family transcriptional regulator	-1.23
SC1717_peak_94	BB341_RS04315	DUF456 domain-containing protein	0.781179
SC1717_peak_95	BB341_RS04280	GntR family transcriptional regulator	0.259356
SC1717_peak_96	BB341_RS04235	dehydrogenase	-1.95
SC1717_peak_97	BB341_RS04200	LacI family transcriptional regulator	-0.61
SC1717_peak_98	BB341_RS04180	ABC transporter ATP-binding protein	-5.46
SC1717_peak_99	BB341_RS04160	hypothetical protein	ND
SC1717_peak_100	BB341_RS04130	hypothetical protein	0.3126
SC1717_peak_101	BB341_RS04100	hypothetical protein	0.212432
SC1717_peak_102	BB341_RS03945	hypothetical protein	ND
SC1717_peak_103	BB341_RS03800	type I methionyl aminopeptidase	0.317834
SC1717_peak_104	BB341_RS03665	3-hydroxybutyryl-CoA dehydrogenase	1.58
SC1717_peak_105	BB341_RS03565	sulfite oxidase	ND
SC1717_peak_106	BB341_RS03510	hypothetical protein	-0.59
SC1717_peak_107	BB341_RS03355	sugar phosphate isomerase/epimerase	ND
SC1717_peak_108	BB341_RS03260	chemotaxis protein CheR	0.526199
SC1717_peak_109a	BB341_RS22675	potassium transporter Trk	ND
SC1717_peak_110	BB341_RS03215	ATP-binding protein	-2.34
SC1717_peak_111	BB341_RS03170	glucose dehydrogenase	0.58117
SC1717_peak_112	BB341_RS03155	LacI family transcriptional regulator	-1.79
SC1717_peak_113	BB341_RS24785	hypothetical protein	ND
SC1717_peak_114	BB341_RS03100	hypothetical protein	-0.2
SC1717_peak_115	BB341_RS02760	TetR family transcriptional regulator	0.394117
SC1717_peak_116a	BB341_RS02750	MBL fold metallo-hydrolase	0.327416
SC1717_peak_117	BB341_RS02450	ferredoxin reductase	-2.45
SC1717_peak_118	BB341_RS02270	dimethylallyltranstransferase	0.552912
SC1717_peak_119	BB341_RS02265	sulfite exporter TauE/SafE family protein	1.46
SC1717_peak_120	BB341_RS02230	hypothetical protein	1.24
SC1717_peak_121	BB341_RS01575	DNA-binding response regulator	1.42
SC1717_peak_122	BB341_RS01355	redox-sensitive transcriptional activator SoxR	0.661029
SC1717_peak_123	BB341_RS01220	acyltransferase	0.558059
SC1717_peak_124	BB341_RS01050	hypothetical protein	-0.25
SC1717_peak_125	BB341_RS01030	hypothetical protein	-0.14
SC1717_peak_126	BB341_RS01015	hypothetical protein	-0.85
SC1717_peak_127a	BB341_RS01010	hypothetical protein	0.200062
SC1717_peak_128	BB341_RS00995	RNA polymerase subunit sigma	-0.89
SC1717_peak_129	BB341_RS00955	sensor histidine kinase KdpD	1.39
SC1717_peak_130a	BB341_RS00940	membrane protein	-2.7
SC1717_peak_131	BB341_RS00865	hypothetical protein	-1.21
SC1717_peak_132	BB341_RS00780	NAD(P)/FAD-dependent oxidoreductase	1.37472
SC1717_peak_133	BB341_RS00560	prenyltransferase	-1.48
SC1717_peak_134	BB341_RS00535	hypothetical protein	-0.72
SC1717_peak_135	BB341_RS00480	hybrid non-ribosomal peptide synthetase/type I polyketide synthase	1.96
SC1717_peak_136	BB341_RS00480	hybrid non-ribosomal peptide synthetase/type I polyketide synthase	1.96
SC1717_peak_137a	BB341_RS00460	hypothetical protein	1.94
SC1717_peak_138	BB341_RS00450	serine/threonine protein kinase	1.31
SC1717_peak_139	BB341_RS00445	histidine kinase	1.4
SC1717_peak_140	BB341_RS00430	phosphoribosyltransferase	-0.2
SC1717_peak_141	BB341_RS00200	choline oxidase	0.117325
SC1717_peak_142a	BB341_RS00175	hypothetical protein	-0.68
SC1717_peak_143a	BB341_RS00150	hypothetical protein	0.913063
SC1717_peak_144	BB341_RS00090	sodium/hydrogen exchanger	0.300773
SC1717_peak_145	BB341_RS00030	aminotransferase class V-fold PLP-dependent enzyme	0.6335
SC1717_peak_146	BB341_RS00075	siderophore biosynthesis protein	-0.2
SC1717_peak_148	BB341_RS27820	restriction endonuclease	-1.67
SC1717_peak_149	BB341_RS27965	hypothetical protein	0.838669
SC1717_peak_150a	BB341_RS28050	rifampin monooxygenase	ND
SC1717_peak_150b	BB341_RS28055	cytochrome P450	1.34
SC1717_peak_151	BB341_RS28095	transporter	0.268393
SC1717_peak_152	BB341_RS31860	hypothetical protein	ND
SC1717_peak_153	BB341_RS28195	PLP-dependent aminotransferase family protein	0.0610605
SC1717_peak_154	BB341_RS28195	PLP-dependent aminotransferase family protein	0.0610605
SC1717_peak_155a	BB341_RS28250	helix-turn-helix transcriptional regulator	-1.23
SC1717_peak_156	BB341_RS28350	TetR/AcrR family transcriptional regulator	0.456891
SC1717_peak_157	BB341_RS28435	XRE family transcriptional regulator	0.259225
SC1717_peak_158	BB341_RS28520	hypothetical protein	0.0738486
SC1717_peak_159	BB341_RS31900	hypothetical protein	ND
SC1717_peak_160	BB341_RS28735	glutathione S-transferase	ND
SC1717_peak_161	BB341_RS28745	FMNH2-utilizing oxygenase	2.43
SC1717_peak_162	BB341_RS29145	hybrid non-ribosomal peptide synthetase/type I polyketide synthase	0.13128
SC1717_peak_163a	BB341_RS31975	MULTISPECIES: hypothetical protein	ND
